# 1 Conservation of *Nematocida* microsporidia gene expression and host response in 2 *Caenorhabditis* nematodes

3  
4 Yin Chen Wan<sup>1</sup>, Emily R. Troemel<sup>2</sup>, Aaron W. Reinke<sup>1#</sup>

5  
6 <sup>1</sup> Department of Molecular Genetics, University of Toronto, Toronto, ON, Canada.

7 <sup>2</sup> School of Biological Sciences, University of California, San Diego, La Jolla, California, United  
8 States of America.

9  
10 #Author for Correspondence: Aaron W. Reinke, Department of Molecular Genetics, University  
11 of Toronto, Toronto, ON, Canada, 416-946-0889, [aaron.reinke@utoronto.ca](mailto:aaron.reinke@utoronto.ca)

## 12 13 Abstract

14 Microsporidia are obligate intracellular parasites that are known to infect most types of  
15 animals. Many species of microsporidia can infect multiple related hosts, but it is not known if  
16 microsporidia express different genes depending upon which host species is infected or if the  
17 host response to infection is specific to each microsporidia species. To address these  
18 questions, we took advantage of two species of *Nematocida* microsporidia, *N. parisii* and *N.*  
19 *ausubeli*, that infect two species of *Caenorhabditis* nematodes, *C. elegans* and *C. briggsae*.  
20 We performed RNA-seq at several time points for each host infected with either microsporidia  
21 species. We observed that *Nematocida* transcription was largely independent of its host. We  
22 also observed that the host transcriptional response was similar when infected with either  
23 microsporidia species. Finally, we analyzed if the host response to microsporidia infection was  
24 conserved across host species. We observed that although many of the genes upregulated in  
25 response to infection are not direct orthologs, the same expanded gene families are  
26 upregulated in both *Caenorhabditis* hosts. Together our results describe the transcriptional  
27 interactions of *Nematocida* infection in *Caenorhabditis* hosts and demonstrate that these  
28 responses are evolutionarily conserved.  
29

30 **Key words:** *Nematocida* microsporidia, *Caenorhabditis* nematodes, immunity, transcriptional  
31 response, host-pathogen interactions

## 32 Significance statement

33 Microsporidia are a powerful model to study pathogen evolution, but much is still unknown  
34 about how these pathogens have evolved to infect multiple host species. We found that  
35 microsporidia express most of their genes similarly even when they are infecting different host  
36 species and that related host species respond similarly to different microsporidia. Our results  
37 suggests that there are conserved transcriptional responses during microsporidia infection.

## 38 Introduction

39 Microsporidia are obligate eukaryotic intracellular pathogens (Vávra and Lukeš, 2013). This  
40 fungal-related phylum contains over 1400 described species that infect a wide range of animal  
41 hosts including invertebrates, vertebrates, and protists (Stentiford *et al.*, 2016; Bojko *et al.*,  
42 2022). Although as a phylum microsporidia infect a wide range of hosts, most species only  
43 infect one or several closely related hosts (Murareanu *et al.*, 2021; Willis and Reinke, 2022).  
44 Throughout evolution, microsporidia have lost many metabolic and biosynthesis genes which  
45 are present in other eukaryotes (Nakjang *et al.*, 2013). These adaptations to survive within  
46 their hosts have resulted in microsporidia having the smallest known eukaryotic genomes  
47 (Katinka *et al.*, 2001). These features of microsporidia being able to specifically infect most  
48 types of animals with a limited coding capacity have made microsporidia a powerful model for  
49 understanding the evolution of intracellular parasites (James *et al.*, 2013; Haag *et al.*, 2014;  
50 Quandt *et al.*, 2017; Wadi and Reinke, 2020).

51  
52 The model nematode *Caenorhabditis elegans* has become an important system for studying  
53 microsporidia infections (Teclé and Troemel, 2022). *Nematocida parisii* and *Nematocida*  
54 *ausubeli* (referred to as *Nematocida* sp. 1 in some publications) are the two microsporidia  
55 species most commonly observed to infect *Caenorhabditis elegans* (Zhang *et al.*, 2016).  
56 These two species of *Nematocida* are also commonly found to infect *Caenorhabditis briggsae*,  
57 which has been developed as a comparative species to *C. elegans* (Stein *et al.*, 2003). These  
58 two nematode species live in distinct, but overlapping geographical locations (Barrière and  
59 Félix, 2005). *N. parisii* was first found infecting *C. elegans* outside of Paris and *N. ausubeli*  
60 was originally found infecting *C. briggsae* in India (Troemel *et al.*, 2008). Since then, both  
61 microsporidia species have been found infecting both hosts in Europe (Zhang *et al.*, 2016).  
62 There are some similarities of infection shared between these two *Nematocida* species; they  
63 both exclusively infect the intestine, cause intestinal cells to fuse, and have similar life cycles  
64 (Balla *et al.*, 2016). Both species also use similar types of secreted and membrane bound  
65 proteins to interface with host proteins (Reinke *et al.*, 2017). There are also differences in their  
66 infection characteristics, such as *N. ausubeli* displaying faster growth and increased  
67 impairment of host fitness (Balla *et al.*, 2016).

68  
69 In response to microsporidia infection, hosts often display large transcriptional changes. The  
70 gene expression of *C. elegans* in response to *N. parisii* infection is reported to be distinct from  
71 responses to extracellular pathogens, but similar to nodavirus infection (Bakowski *et al.*, 2014).  
72 This transcriptional response has been termed the intracellular pathogen response (IPR)  
73 (Reddy *et al.*, 2017). Among upregulated IPR genes, many contain F-box, FTH, and MATH  
74 domains that are implicated in substrate recognition during ubiquitin-mediated degradation  
75 (Thomas, 2006; Bakowski *et al.*, 2014). The IPR also includes upregulation of several  
76 *Caenorhabditis* specific families that are still poorly understood, such as the PALS family  
77 (Leyva-Díaz *et al.*, 2017). Mutants that cause the IPR to be upregulated are resistant to  
78 infection and can clear *N. parisii* infections (Reddy *et al.*, 2019; Teclé *et al.*, 2021; Willis *et al.*,  
79 2021).

80  
81 Studies looking at infection of nematodes by different bacterial and fungal pathogens showed  
82 both significant overlap between pathogen infections, as well as species-specific responses  
83 (Wong *et al.*, 2007; Engelmann *et al.*, 2011; Lansdon, Carlson and Ackley, 2022). In addition,  
84 recognition of two species of oomycete displayed a shared transcriptional response (Grover  
85 *et al.*, 2021). Similarities of responses between different host species have also been observed.  
86 For example the response to nodavirus infection is conserved between *C. elegans* and *C.*  
87 *briggsae* (Chen *et al.*, 2017). An intergenerational transcriptional response to *Pseudomonas*  
88 *vranovensis* was conserved between some, but not all species of *Caenorhabditis* (Burton *et*  
89 *al.*, 2021). A study looking at different species of bacterial infection in the nematode  
90 *Pristionchus pacificus* also showed both similarities and differences between the  
91 transcriptional responses in the two hosts (Sinha *et al.*, 2012). Although conservation of  
92 responses between pathogen and hosts in *C. elegans* is observed, different strains of bacteria  
93 can elicit different responses, and different strains of *C. elegans* can have distinct responses  
94 (Zárate-Potes *et al.*, 2020; Lansdon, Carlson and Ackley, 2022).

95  
96 To determine the extent that microsporidia gene expression is influenced by its host and how  
97 conserved the host response is to microsporidia infection, we generated and analysed  
98 transcriptional data of *N. parisii* and *N. ausubeli* infecting *C. elegans* and *C. briggsae*. We  
99 observe similar transcriptional patterns of each *Nematocida* species in the two species of  
100 hosts with only a small set of differentially regulated genes. The host response to either of the  
101 two microsporidia species was also similar. This transcriptional response is conserved across  
102 host species. Altogether, our results suggest that different *Nematocida* species do not have  
103 distinct expression programs depending on the host, and transcriptional responses of  
104 *Caenorhabditis* hosts to *Nematocida* infection are conserved.

105

106  
107  
108  
109  
110  
111  
112  
113  
114  
115  
116  
117  
118  
119  
120  
121  
122  
123  
124  
125  
126  
127  
128  
129  
130  
131  
132  
133  
134  
135  
136  
137  
138  
139  
140  
141  
142  
143  
144  
145  
146  
147  
148  
149  
150  
151  
152  
153  
154  
155  
156  
157  
158  
159  
160

## Results

### Gene expression of *N. parisii* and *N. ausubeli* is similar in *C. elegans* and *C. briggsae*

To understand how gene expression of related microsporidia and hosts species is conserved, we infected *Caenorhabditis* nematodes with *Nematocida* microsporidia (fig. 1A). We designed our infection experiment to compare transcriptional differences between related microsporidia and host species (fig. 1B). Unlike previous transcriptional profiling experiments of *Nematocida* infection which were done as continuous infections (Bakowski *et al.*, 2014; Chen *et al.*, 2017), we infected the worms for a short period of time to synchronize the infection. We pulse-infected *C. elegans* and *C. briggsae* with either *N. parisii*, *N. ausubeli*, or a mock treatment for 2.5 hours, washed to remove spores from outside the worms, and then replated the animals for a total of 10, 20, or 28 hours of infection. Each condition was done once, except for the 10-hour time point which was performed in duplicate (fig. 1A). Samples were stained using a probe specific to the *Nematocida* 18S rRNA and we observed that greater than 75% of each population was infected (figs. 2A and B). Compared to *N. parisii*-infected animals, we observed more parasite in *N. ausubeli*-infected hosts at 28 hours, consistent with a previous report that *N. ausubeli* grows faster (Balla *et al.*, 2016). RNA from infected and uninfected animals was extracted and sequenced. To determine the expression of microsporidia genes, we mapped reads of *N. parisii* and *N. ausubeli* to their respective genomes (Supplementary table S1). At 10 hours post infection, the overall percentage of reads from either *N. parisii* or *N. ausubeli* were <1%, which increased to ~3-5% at 28 hours post infection (fig. 2C).

To define the transcriptional patterns of *N. parisii* and *N. ausubeli* during infection, we analysed RNA-seq results of each microsporidia species between *C. elegans* and *C. briggsae* at 10, 20, and 28 hours post infection. First, we used principal component analysis to compare microsporidia gene expression in each of these samples. We observed that at the 10-hour time point, there is a larger difference between expression in the two hosts, and at the later time points, expression in the two hosts is similar (figs. 3A and B). The 20- and 28-hour time points in *N. parisii* cluster closely together, but there is a larger difference between these time points in *N. ausubeli*, likely due to the accelerated growth of this species (Balla *et al.*, 2016). Moreover, we observed the expression of genes in each microsporidia species to be similar between the two *Caenorhabditis* hosts across the timepoints (figs. 3C and D, S1A and S1B). Strong correlation of *Nematocida* gene expression between *C. elegans* and *C. briggsae* was also observed, with similar levels of correlation of each microsporidia species in either host than between replicates in the same host (figs. 3E and F, S1C and S1D). These similarities between expression in different host species also did not change across time points as the parasite had gone through larger amounts of replication. At 10 hours post infection, over 45% of *Nematocida* genes are within 2-fold of each other, and over 60% are within four-fold of each other. As the time post infection increased to 28 hours, over 75% of *Nematocida* genes are within two-fold of each other, and more than 89% are within four-fold of each other. The similarity is even more pronounced in highly expressed genes (genes with greater than 100 FPKM in either host) at the 20- and 28-hour time point where 95-99% are within four-fold of each other.

To determine genes that are significantly differentially regulated depending upon the host species infected, we compared the 10-hour time points of each *Nematocida* species between the two hosts at 10 hours post infection (fig. 4A and B). We identified 34 differentially regulated genes in *N. parisii* and 11 in *N. ausubeli* ( $\alpha < 0.05$ ) (Supplementary table S1). Most of these differentially regulated genes had higher expression in *C. elegans* than *C. briggsae* (31/34 in *N. parisii* and 7/11 in *N. ausubeli*). Notably, differentially regulated genes were significantly enriched for ribosomal protein genes in both *N. parisii* (17/34, Fisher's exact test  $p$ -value= $2.2 \times 10^{-18}$ ) and *N. ausubeli* (6/11, Fisher's exact test  $p$ -value= $1.2 \times 10^{-8}$ ). Taken together, our results indicate that the transcriptional programs of *N. parisii* and *N. ausubeli* are largely independent of which *Caenorhabditis* hosts they infect.

161  
162  
163  
164  
165  
166  
167  
168  
169  
170  
171  
172  
173  
174  
175  
176  
177  
178  
179  
180  
181  
182  
183  
184  
185  
186  
187  
188  
189  
190  
191  
192  
193  
194  
195  
196  
197  
198  
199  
200  
201  
202  
203  
204  
205  
206  
207  
208  
209  
210  
211  
212  
213  
214  
215

## Shared and unique transcriptional responses of each *Caenorhabditis* host to *N. parisii* and *N. ausubeli* infection

Different microsporidia species may induce similar or distinct transcriptional responses in the same host. To address this question, we compared how either *C. elegans* or *C. briggsae* responded to infection with either *N. parisii* or *N. ausubeli* at the 10-hour timepoint for which we had replicate data. We first mapped the reads from each sample to the corresponding host genome (Supplementary table S2). In *C. elegans*, we identified 875 genes that are significantly differentially regulated in *N. parisii* infected samples and 735 genes that are significantly differentially regulated in *N. ausubeli* infected samples (fig. 5A-B and Supplementary table S3). For *C. briggsae*, 1091 genes are significant in *N. parisii* infected samples while 449 were significant in *N. ausubeli* infected samples (fig. 5C-D and Supplementary table S3). There are more downregulated than upregulated genes in each sample. Next, we directly compared shared genes which are upregulated in each of the *Caenorhabditis* hosts when infected by *N. parisii* or *N. ausubeli*. We observed significant overlap in the transcriptional response to these infections with 222 upregulated genes shared in *C. elegans* and 117 upregulated genes shared in *C. briggsae*.

We next compared both the overlapping and unique genes between samples to determine if they are enriched in known biological functions. Using statistical enrichment tests, we observed that the shared upregulated genes in *N. parisii* and *N. ausubeli* infected *C. elegans* are enriched for GO Biological Process associated with metabolism; as well as GO Molecular Process associated with catalytic activity (FDR<0.05, Supplementary table S4). We did not observe any enrichment in the shared upregulated genes in *C. briggsae*, however the 267 shared downregulated *C. briggsae* genes showed enrichment for small molecule binding and structural constituent of cuticle (Supplementary table S4). Of the non-shared genes, only the 415 downregulated genes in *C. briggsae* infected with *N. parisii* showed enrichment for GO Molecular Process associated with structural constituent of cuticle and protein binding (Supplementary table S4).

We then compared our RNA-seq data to previously published studies of the transcriptional response to *N. parisii* infection (Supplementary table S5). Bakowski *et al.* performed RNA-seq at multiple time points of a germline-deficient mutant of *C. elegans* continuously infected with spores at the L3/L4 stage at 25°C. We compared our 10-hour time point to the five time points in the Bakowski *et al.* study and observed strong overlap especially at the 8-, 16-, and 30-hour time points (Supplementary fig. S2A). We observed significant overlap for all the time points with both our *N. parisii* and *N. ausubeli* 10-hour post infection samples (fig. S2B-C). We also compared our data to Chen *et al.* where *C. elegans* was infected with *N. parisii* at the L3 stage at 20°C. We observed significant overlap with both our 10-hour *N. parisii* and *N. ausubeli* data (fig. S2D-E). Chen *et al.* also measured Orsay virus infected *C. elegans* and Santeuil virus infected *C. briggsae* and we saw significant similarities to these as well (fig. S2E-D). Together our analysis demonstrates that despite the experimental differences between studies, a largely similar upregulated host response is consistently observed.

## Evolutionary conserved host response to *Nematocida* infection

To investigate the evolutionary conserved response of *Caenorhabditis* to *Nematocida* infection, we studied the expression levels of *C. elegans* and *C. briggsae* orthologs. We identified orthologs using Orthofinder (Emms and Kelly, 2019). Additionally, we determined the subset of orthologs that only had a single copy present in each nematode species. Of the orthogroups shared between *C. elegans* and *C. briggsae*, about 76% are single-copy orthologs (10826/14183). We first clustered the expression of these one-to-one orthologs, which shows a smaller cluster of upregulated genes and a larger cluster of downregulated genes (fig. 6A). When we compared the host response to infection between the two host species, we observed



216 a modest but significant correlation of response to infection between *C. elegans* and *C.*  
217 *briggsae* (fig. 6B). We then compared the statistical significance to the fold change of  
218 differentially expressed genes from the different infection conditions (fig. 6C-D) and  
219 investigated which of these differentially expressed genes were one-to-one orthologs (fig. 6E-  
220 F). We observed that only 8-17% of the differentially upregulated genes were one-to-one  
221 orthologs. Furthermore, of the most highly expressed genes (greater than four-fold), only 0-2%  
222 were one-to-one orthologs. In contrast to less than 20% of significantly upregulated genes not  
223 having one-to-one orthologs, between 29-42% of significantly downregulated genes did.

224  
225 As much of the upregulated response is in the non-single copy orthologs, we analysed these  
226 genes for commonalities between samples. We performed domain enrichment analysis to  
227 determine the types of proteins induced in the non-single copy orthologs by microsporidia  
228 infection. Previous transcriptional analysis of *C. elegans* infected with either *N. parisii* or Orsay  
229 virus has identified several types of domains enriched in expression, such as F-box,  
230 MATH/BATH, PALS, DUF713, DUF684 and C-type lectins (Bakowski *et al.*, 2014; Chen *et al.*,  
231 2017). In addition to these domains, we also included other types of domains that are enriched  
232 in the significantly upregulated and downregulated non-single copy orthologs, for a total of  
233 thirteen domains that we analysed (Supplementary table S6). Finally, the proportion of each  
234 type of domain or gene family in the upregulated and downregulated non-single copy orthologs  
235 was determined (fig. 7A-B). For *C. elegans* infected with *N. parisii*, we observed that ~29% of  
236 the significantly expressed non-single copy orthologs contained at least one of these thirteen  
237 domains, with genes containing PALS domains being the most common. For genes  
238 upregulated after infection with *N. ausinger*, we observed similar trends with ~35% containing  
239 one of these domains. The downregulated genes showed similar domain patterns for both  
240 microsporidia species, with cuticle collagen and glycosyltransferase being the two most  
241 common domains. Similar patterns regarding types of domains in regulated genes induced by  
242 the two microsporidia species was also observed in *C. briggsae* (fig. 7B).

243  
244 As some of the same expanded gene families are upregulated in both *C. elegans* and *C.*  
245 *briggsae*, we sought to determine the relationships between expression of these families in  
246 response to infection. We first constructed gene trees of PALS and DUF713 families (figs.  
247 S3-S4). Next, we compared the expression levels of these orthologs in our 10-hour samples.  
248 This analysis shows that some phylogenetically related PALS and DUF713 genes are  
249 upregulated in both *C. elegans* and *C. briggsae* in response to *Nematocida* infection (fig. 8A-  
250 B).

## 251 252 Discussion

253 To understand the conservation of transcriptional responses during microsporidia infection,  
254 we took the approach of comparing interactions between related microsporidia and host  
255 species. To do this we, used a pair of *Nematocida* species that share ~66% amino acid identity  
256 and have distinct growth and phenotypic characteristics during infection in *C. elegans* (Cuomo  
257 *et al.*, 2012; Balla *et al.*, 2016; Luallen *et al.*, 2016). We used a pair of *Caenorhabditis* species,  
258 for which about 60% of their genes are orthologous and these proteins are 80% identical,  
259 which is approximately the same extent of divergence between humans and mice (Stein *et al.*,  
260 2003). We found that responses between *Caenorhabditis* and *Nematocida* species are largely  
261 conserved. However, there are several limitations to our study. Although we monitored  
262 infection at multiple time points, we only performed duplicates at 10 hours post infection.  
263 Although a small number of replicates limit the ability to detect differentially regulated genes  
264 (Conesa *et al.*, 2016), we saw a large overlap in significantly regulated genes compared to  
265 other *N. parisii* infection datasets (Bakowski *et al.*, 2014; Chen *et al.*, 2017). Our study is also  
266 limited to only two pairs of hosts and microsporidia species. Additionally, differences in  
267 transcriptional responses between species could be dependent upon particular host and  
268 microsporidia strains or environmental conditions.

269

270 Our results suggest that *Nematocida* microsporidia species do not sense and respond  
271 differently depending upon their host environment. The main difference we observed in  
272 *Nematocida* gene expression between the two hosts was an upregulation of both small and  
273 large ribosomal subunit genes in *C. elegans* at 10 hours post infection. We also observed  
274 about three-fold more ribosomal genes being differentially regulated between *N. parisii* and *N.*  
275 *ausubeli*. After invasion both species undergo a lag period before starting replication. This lag  
276 period is slightly shorter in *N. ausubeli* and the larger increase of ribosomal genes in *N. parisii*  
277 is potentially related to these differences in lag time (Balla *et al.*, 2016). The lack of large  
278 differences in the host response also suggests that these *Nematocida* microsporidia are not  
279 differentially regulating host genes for their own benefit.

280  
281 How hosts sense microsporidia infection is not fully understood. In mammals, several toll-like  
282 receptors are necessary for immune activation (Tamim El Jarkass and Reinke, 2020), but the  
283 proteins that *C. elegans* uses to sense and respond to microsporidia infection are mostly  
284 unknown. Several negative regulators of the IPR are known, including PALS-22, LIN-35, and  
285 PNP-1, but none of these are known to be necessary for the response to infection (Reddy *et*  
286 *al.*, 2017, 2019; Tecele *et al.*, 2021; Willis *et al.*, 2021). Recently, a basic-region leucine-zipper  
287 transcription factor, ZIP-1, was found to positively regulate a subset of IPR genes (Lažetić *et*  
288 *al.*, 2022). A viral RNA receptor, DRH-1, is necessary for activation of the IPR by the Orsay  
289 virus, but not for microsporidia infection (Sowa *et al.*, 2019). Whether there is an equivalent  
290 protein that is specifically involved in detecting microsporidia infection in *C. elegans* is  
291 unknown. Although a previous study showed that three IPR genes were induced to a lesser  
292 extent by *N. ausubeli* than *N. parisii* (Zhang *et al.*, 2016) by comparing the full transcriptional  
293 profile we see a largely similar set of genes being induced. As these different microsporidia  
294 species induce a similar transcriptional response, this suggests that some common feature,  
295 such as invasion, is detected by the host.

296  
297 Nematodes, insects, and vertebrates all have strong transcriptional responses to infection by  
298 microsporidia, though the responses appear to be quite diverse (Szumowski and Troemel,  
299 2015; Middtun *et al.*, 2020). For example, antimicrobial peptides are observed to be  
300 upregulated in silkworms and cytokines are induced in infected human cells (Ma *et al.*, 2013;  
301 Flores *et al.*, 2021). The responses seen in these other animals are quite different than what  
302 is observed in *Caenorhabditis*. One reason for this is that many IPR genes are part of large  
303 gene families that are not conserved outside of *Caenorhabditis*, such as PALS (Leyva-Díaz *et*  
304 *al.*, 2017). Little is known about how a host responds to different species of microsporidia. A  
305 study examining two species of microsporidia that infect the same mosquito found that a  
306 horizontally transmitted species elicited a strong transcriptional immune response, but this  
307 response was not enriched during infection with a vertically transmitted species (Desjardins *et*  
308 *al.*, 2015). Further studies will be necessary to know if the similar immune responses we  
309 observe to infection by two horizontally transmitted microsporidia species are common in other  
310 hosts infected by different microsporidia.

311  
312 Microsporidia that infect free-living terrestrial nematodes appear to be common, and there are  
313 other genera and families of nematodes that can be cultured in the laboratory and infected  
314 with microsporidia. Additionally, there are other genera of microsporidia that have been shown  
315 to infect *C. elegans* and other nematodes. Some nematode-infecting microsporidia also infect  
316 multiple genera of nematodes, which could facilitate cross-species host expression (Zhang *et*  
317 *al.*, 2016). These types of broader comparisons would allow for a fuller view of how animals  
318 evolve transcriptional responses to microsporidia infection.

## 319 **Material and Methods**

### 320 **Infection of nematodes with microsporidia**

321  
322  
323

324 *C. elegans* strain N2 and *C. briggsae* strain AF16 were maintained at 21°C on 10-cm  
325 nematode growth medium (NGM) plates seeded with *Escherichia coli* OP50-1 for at least three  
326 generations without starvation. Three plates each of mixed stage populations of animals were  
327 washed with M9 and embryos extracted by treating with sodium hypochlorite/1 M NaOH for  
328 2.5 minutes. Embryos were hatched by incubating for 18 hours at 21°C. ~30,000 L1s of each  
329 species were placed on a 10-cm plates along with 1 ml M9 and 10 µl of 10X OP50-1. Three  
330 plates of each species were prepared. Animals were infected with either 20 million *N. parisii*  
331 (ERTm1) or *N. ausubeli* (ERTm2) spores. These spores were prepared as described  
332 previously (Troemel *et al.*, 2008). Uninfected plates were used as the control. Plates were  
333 dried for 1 hour in a clean cabinet and incubated an additional 1.5 hours at 21°C. Animals  
334 were then removed from plates using two 5 ml washes of M9. After washing samples twice  
335 with 10 ml M9, all but 1 ml of M9 was removed from the samples. An additional 3 ml of M9  
336 and 1 ml of 10X OP50-1 was added to each sample, and 1 ml of this solution was plated onto  
337 4 10-cm plates per sample, resulting in ~6,000 animals per plate. At either 10, 20, or 28 hours  
338 post infection, plates were harvested by washing off worms 3 times with 725 µl M9. Samples  
339 were then washed 3 times with 1 ml M9/0.1% Tween-20.

340

341 To determine the extent of infection, ~1,000 animals from each sample were removed, fixed,  
342 and stained using an *N. parisii* 18S rRNA fluorescent in situ hybridization probe as previously  
343 described (Reinke *et al.*, 2017). Vectashield containing DAPI (Vector Labs) was added and  
344 samples imaged using an Zeiss Axioimager 2.

345

#### 346 **RNA extraction and sequencing**

347 After the last wash, 1 ml of TRIzol was added to each sample and RNA was extracted similar  
348 to as described previously (Bakowski *et al.*, 2014). mRNA libraries were prepared by the  
349 UCSD IGM Genomics Center and sequenced on a single lane of an Illumina HiSeq 4000,  
350 using 100 bp paired-end reads.

351

#### 352 **Microsporidia gene expression analysis**

353 Reads from each sample were mapped to either *Nematocida parisii* strain ERTm1 (Genbank:  
354 GCF\_000250985.1) or *Nematocida ausubeli* strain ERTm2 (Genbank: GCA\_000250695.1)  
355 using TopHat v2.1.2 (Trapnell, Pachter and Salzberg, 2009). The respective *N. parisii* and *N.*  
356 *ausubeli* genome annotation files were converted into .gtf format using Gffread v0.12.3.  
357 Transcriptome assemblies were then generated using Cufflinks v2.2.1 (Trapnell *et al.*, 2010)  
358 and Cuffmerge in the Cufflinks package. Differentially expressed genes were determined  
359 using Cuffdiff v2.2.1 (Trapnell *et al.*, 2013) and were visualised using the R package  
360 cummeRbund v2.36.0 (L. Goff, 2017).

361

362 The Fragments Per Kilobase of transcript per Million mapped reads (FPKM) values of *N. parisii*  
363 and *N. ausubeli* transcripts in each *Caenorhabditis* host were calculated by Cuffdiff v2.2.1  
364 (Trapnell *et al.*, 2013). The linear correlation between gene expression in each host was  
365 determined using the R packages ggplot2 v3.3.5 and ggpubr v0.4.0; the ratio of FPKM values  
366 between the two hosts was calculated by dividing the microsporidia's FPKM values in *C.*  
367 *elegans* by that of *C. briggsae*'s. Hierarchical clustering of log<sub>10</sub>-transformed FPKM+1 values  
368 was done using the hclust function from the R package stats v4.1.1; heatmaps were generated  
369 by ggplot2 v3.3.5 in R.

370

#### 371 ***Caenorhabditis* RNA-seq analysis**

372 The paired end reads of each sample 10 hours post infection sample were submitted to Alaska  
373 v1.7.2 (<http://alaska.caltech.edu>). Briefly, Bowtie2 (Langmead and Salzberg, 2012), Samtools  
374 (Li *et al.*, 2009), RSeQC (Wang, Wang and Li, 2012), FastQC, and MultiQC (Ewels *et al.*, 2016)  
375 were used for quality control of the input files. Then, Kallisto (Bray *et al.*, 2016) was used for  
376 read alignment and quantification, followed by differential analysis using Sleuth (Pimentel *et*  
377 *al.*, 2017). For *C. elegans* samples, the reads were aligned to the N2 reference of the WS268

378 release (accession: PRJNA13758); the reads from *C. briggsae* samples were aligned to  
379 reference genome of the WS268 release (accession: PRJNA10731).

380

381 Log2 fold change values of duplicated genes in each of the eight samples were averaged  
382 using the R package dplyr v1.0.8. Genes with FDR-adjusted p-value of <0.05 were regarded  
383 as significant. Differentially upregulated genes were defined as those with an FDR-adjusted  
384 p-value<0.05 and log2 fold change  $\geq 0$  (infected vs. control); differentially downregulated  
385 genes were defined as those with an FDR-adjusted p-value <0.05 and log2 fold change  $\leq 0$   
386 (infected vs. control).

387

### 388 **Principal component analysis**

389 The normalised abundance measurements in *C. elegans* and *C. briggsae* generated by Alaska,  
390 were read by the readRDS() function of the R package base v4.1.1. Normalized counts for  
391 each gene in each host species were generated via sleuth\_to\_matrix() with the “obs\_norm”  
392 data and “tpm” units. PCA of gene expression was performed using samples from each  
393 species via the R package pcaexplorer v2.20.2 (Marini and Binder, 2019).

394

### 395 **Determination of gene expression overlap**

396 Genes with an FDR<0.05 were used to compare expression overlap. Values of duplicated  
397 genes in each sample were averaged using the R package dplyr v1.0.8. Overlap between  
398 samples was determined using the R package gplots v3.1.1. The p-values were calculated  
399 using the Fisher exact test. Statistical enrichment tests of shared and non-shared genes were  
400 performed using PANTHER on pantherdb.org (Mi *et al.*, 2021). Each input list was statistically  
401 tested for enrichment against the annotation sets: “GO biological process complete”, “GO  
402 cellular component complete”, “GO molecular function complete”, “PANTHER GO-Slim  
403 Biological Process”, “PANTHER GO-Slim Cellular Component”, “PANTHER GO-Slim  
404 Molecular Function”, “PANTHER Pathways”, “Reactome pathways” and “PANTHER Protein  
405 Class”. Results from these tests with p-value<0.05 are in Supplementary table S4.

406

407 To determine overlap in our samples compared to differentially regulated genes from  
408 Bakowski *et al.*, we first used Alaska to process the read files of *C. elegans* infected by *N.*  
409 *parisii* samples at 8, 16, 30, 40 and 64 hours. To compare our samples’ expression with data  
410 from Bakowski *et al.*, genes expressed in at least four of those samples were used for  
411 hierarchical clustering by hclust function in the R package stats v4.1.1. The dendrogram in the  
412 was produced using the R package gg dendrogram v0.1.23; the heatmap was generated by  
413 ggplot2 v3.3.5. Overlap between our samples, the Bakowski *et al.*, (2014) samples, and the  
414 Chen *et al.* (2017) samples containing differentially regulated genes for *C. elegans* N2 infected  
415 by Orsay virus or *N. parisii*, and *C. briggsae* infected by Santeuil virus were calculated as  
416 described above.

417

### 418 **Domain enrichment analysis**

419 The type of gene classes and domains investigated for the enrichment analyses are listed in  
420 Supplementary table S6. Among these, we actively chose to look at F-box, MATH/BATH,  
421 PALS, DUF684, DUF713, C-type lectins, and *skr* domains containing genes, implicated from  
422 differentially regulated genes of *N. parisii* infected *C. elegans* in previous publications  
423 (Bakowski *et al.*, 2014; Chen *et al.*, 2017). We also examined additional types of genes and  
424 domains enriched in our datasets using DAVID Bioinformatics Resources (2021) (Huang, Brad  
425 T. Sherman and Lempicki, 2009; Huang, Brad T Sherman and Lempicki, 2009) for *C. elegans*  
426 and the WormBase Simple Gene Queries tool for *C. briggsae*. From this analysis, we found  
427 additional domains and genes enriched with greater than three domain-containing proteins in  
428 any of our samples. These identified domains are chitinase-like (*chil*) proteins, CUB and CUB-  
429 like domains, cytochrome P450, glucosyltransferase family 92, nematode cuticle collagen N-  
430 terminal domain, and UDP-glucuronosyltransferase. A list of gene names from respective  
431 gene classes were downloaded separately from Wormbase (<http://wormbase.org/>) and the  
432 corresponding protein-coding sequences were extracted from Wormbase ParaSite



433 (<https://parasite.wormbase.org/>). Alignments of other domains or classes were downloaded  
434 directly from Pfam (<http://pfam.xfam.org/>) separately. After deleting duplicated sequences,  
435 protein sequences of these classes of genes were converted to Stockholm format using  
436 Clustal Omega Multiple Sequence Alignment tool (<https://www.ebi.ac.uk/Tools/msa/clustalo/>).  
437 Hmmbuild of HMMER v3.3.2 (Eddy, 2011) was used to build respective profile HMMs, which  
438 was then searched against *C. elegans* (accession: PRJNA13758) proteome of WS268 release  
439 using hmmsearch. Output genes with E-value <1e-5 were used as the gene list for the  
440 enrichment analyses. In the output genes, MATH and BATH genes were combined into one  
441 list; *fbxa*, *fbxb* and *fbxc* genes were merged into the gene list for F-box while genes with CUB  
442 and CUB-like domains were categorised together (Supplementary table S6). Using the R  
443 package gplots v3.1.1, the number of genes overlapping between the lists and samples were  
444 computed, then plotted using R package ggplot2 v3.3.5. Genes that do not fall into any of  
445 these gene classes or have any of these domains were categorized as “other”.

#### 446 **Determination of orthologs between *C. elegans* and *C. briggsae***

447 Orthologous genes were determined between *C. elegans* (accession: PRJNA13758) and *C.*  
448 *briggsae* (accession: PRJNA13758) proteomes of the WS268 release using Orthofinder v2.5.2  
449 with the default settings (Emms and Kelly, 2019).

#### 451 **Single copy orthologs analysis**

452 Genes that are single copy orthologs were extracted, based on the single copy orthologs list  
453 computed by Orthofinder. Single copy orthologs expressed in at least one out of the four  
454 samples were used for hierarchical clustering via the function hclust() from the R package  
455 stats v4.1.1, then plotted using R packages gg dendrogram and ggplot2 v3.3.5. The linear  
456 correlation of each single copy ortholog expression between the two host was calculated using  
457 ggpubr v0.4.0. The scatterplots and volcano plots were generated by ggplot2 v3.3.5.

#### 459 **Comparison of gene expression in expanded gene families**

460 The *C. elegans* and *C. briggsae* genes in PALS and DUF713 families were obtained from the  
461 output of HMMER v3.3.2 (Eddy, 2011) using a E-value threshold of <1e-5. The protein  
462 sequences of the genes were obtained from Wormbase ParaSite  
463 (<https://parasite.wormbase.org/>) and aligned by M-Coffee using default settings (Notredame,  
464 Higgins and Heringa, 2000; Di Tommaso *et al.*, 2011). A phylogenetic tree for each family was  
465 generated using MrBayes (Huelsenbeck and Ronquist, 2001; Ronquist and Huelsenbeck,  
466 2003) with the following settings: lset nst = 1, rates = invgamma, nruns = 2, stoprule = YES,  
467 stopval = 0.05 and mcmc diagn = YES. A dendrogram of the phylogenetic tree of each gene  
468 family was created using the function ReadDendrogram from the R package DECIPHER  
469 v2.22.0. For each gene family, the orthologs' log<sub>2</sub> fold change values across the *C. elegans*  
470 and *C. briggsae* samples were plotted as a heatmap using ggplot2 v3.3.5.

#### 472 **Data availability**

473 All samples were deposited under NCBI BioProject PRJNA841614 and the sequence reads  
474 for all samples were submitted to the NCBI Sequence Read Archive.

#### 476 **Acknowledgements**

477 We thank Hala Tamim El Jarkass, Meng A. Xiao, and Winnie Zhao for providing helpful  
478 comments on the manuscript. We thank Winnie Zhao for technical help for the comparisons  
479 to the Bakowski data. This work was supported by a Canadian Institutes of Health Research  
480 grant no. 400784 (to A.R.), an Alfred P. Sloan Research Fellowship FG2019-12040 (to A.R.),  
481 and NIH R01's AG052622 and GM114139 to E.T. Some strains were provided by the CGC,  
482 which is funded by NIH Office of Research Infrastructure Programs (P40 OD010440) and we  
483 thank WormBase.

484

486 **Author contributions:** Y.C.W. and A.R. conceived of the project. Y.C.W. performed all  
487 computational analyses. A. R. performed all experiments. E.T. and A. R. provided mentorship  
488 and acquisition of funding. Y.C.W. and A.R. co-wrote the paper with edits from E.T.

489

490 **Competing Interests:** The authors declare that they have no competing interests.

491

492 **Figures and legends**

493

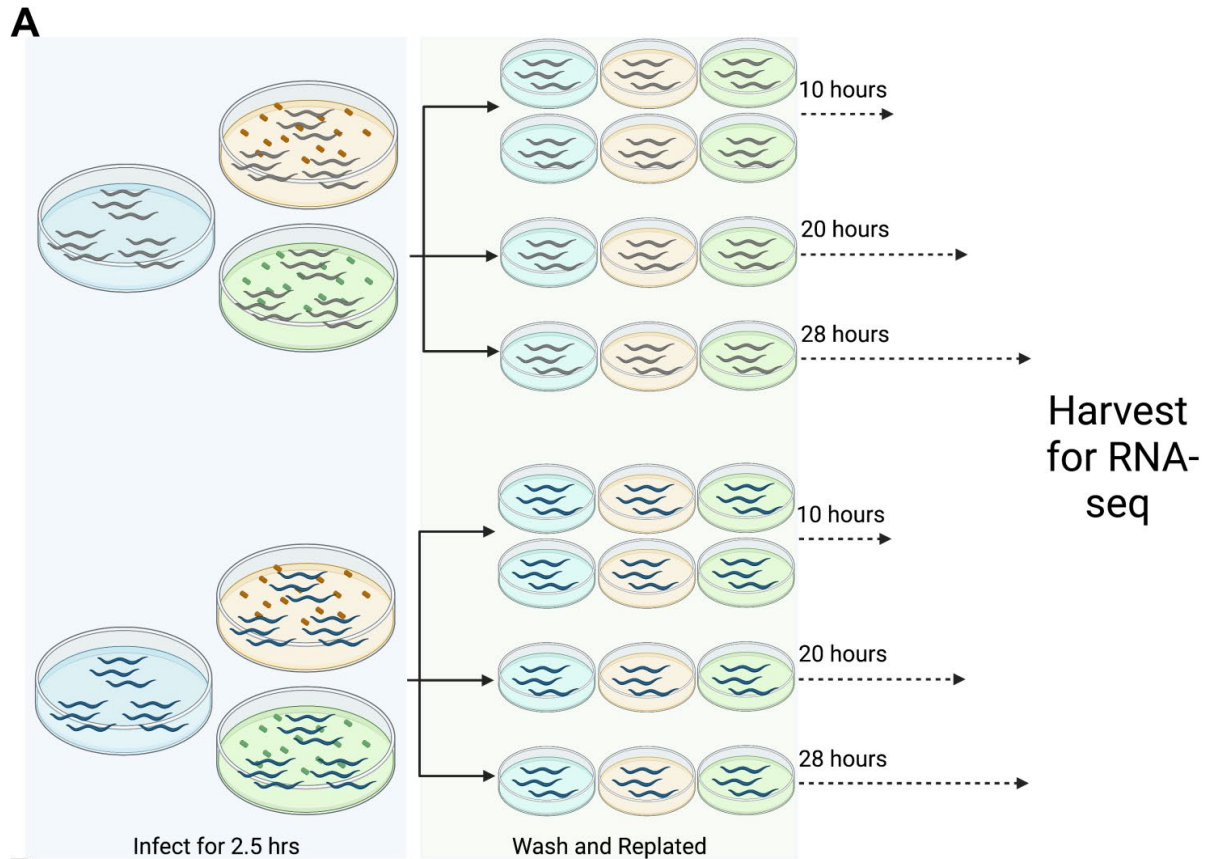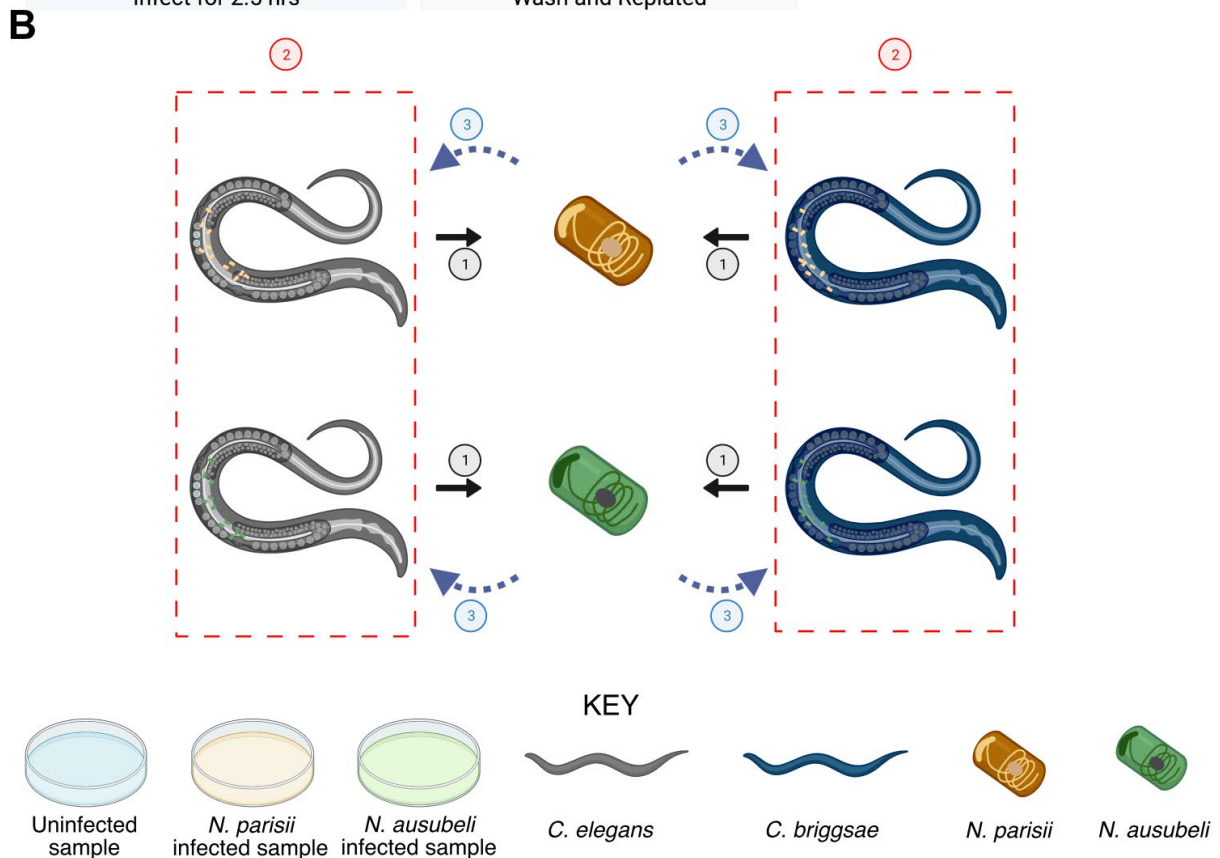

494  
495  
496  
497  
498

**Fig. 1. Overview of study design.** (A) Schematic diagram of the RNA-seq experiment. *C. elegans* and *C. briggsae* were either not infected or infected with *N. parisii* or *N. ausubeli* separately at the L1 stage for two and a half hours. Next, animals were washed to remove any remaining microsporidia spores and replated. Worms were harvested for RNA-sequencing at

499 10, 20 and 28 hours after infection. (B) The three comparisons of transcriptional responses  
500 made in this study are represented. Comparison 1 is microsporidia gene expression between  
501 hosts, comparison 2 is the response of each host species to different microsporidia species,  
502 and comparison 3 is the conserved response between different hosts to each microsporidia  
503 species. Figure was created with biorender ([www.biorender.com](http://www.biorender.com)).  
504



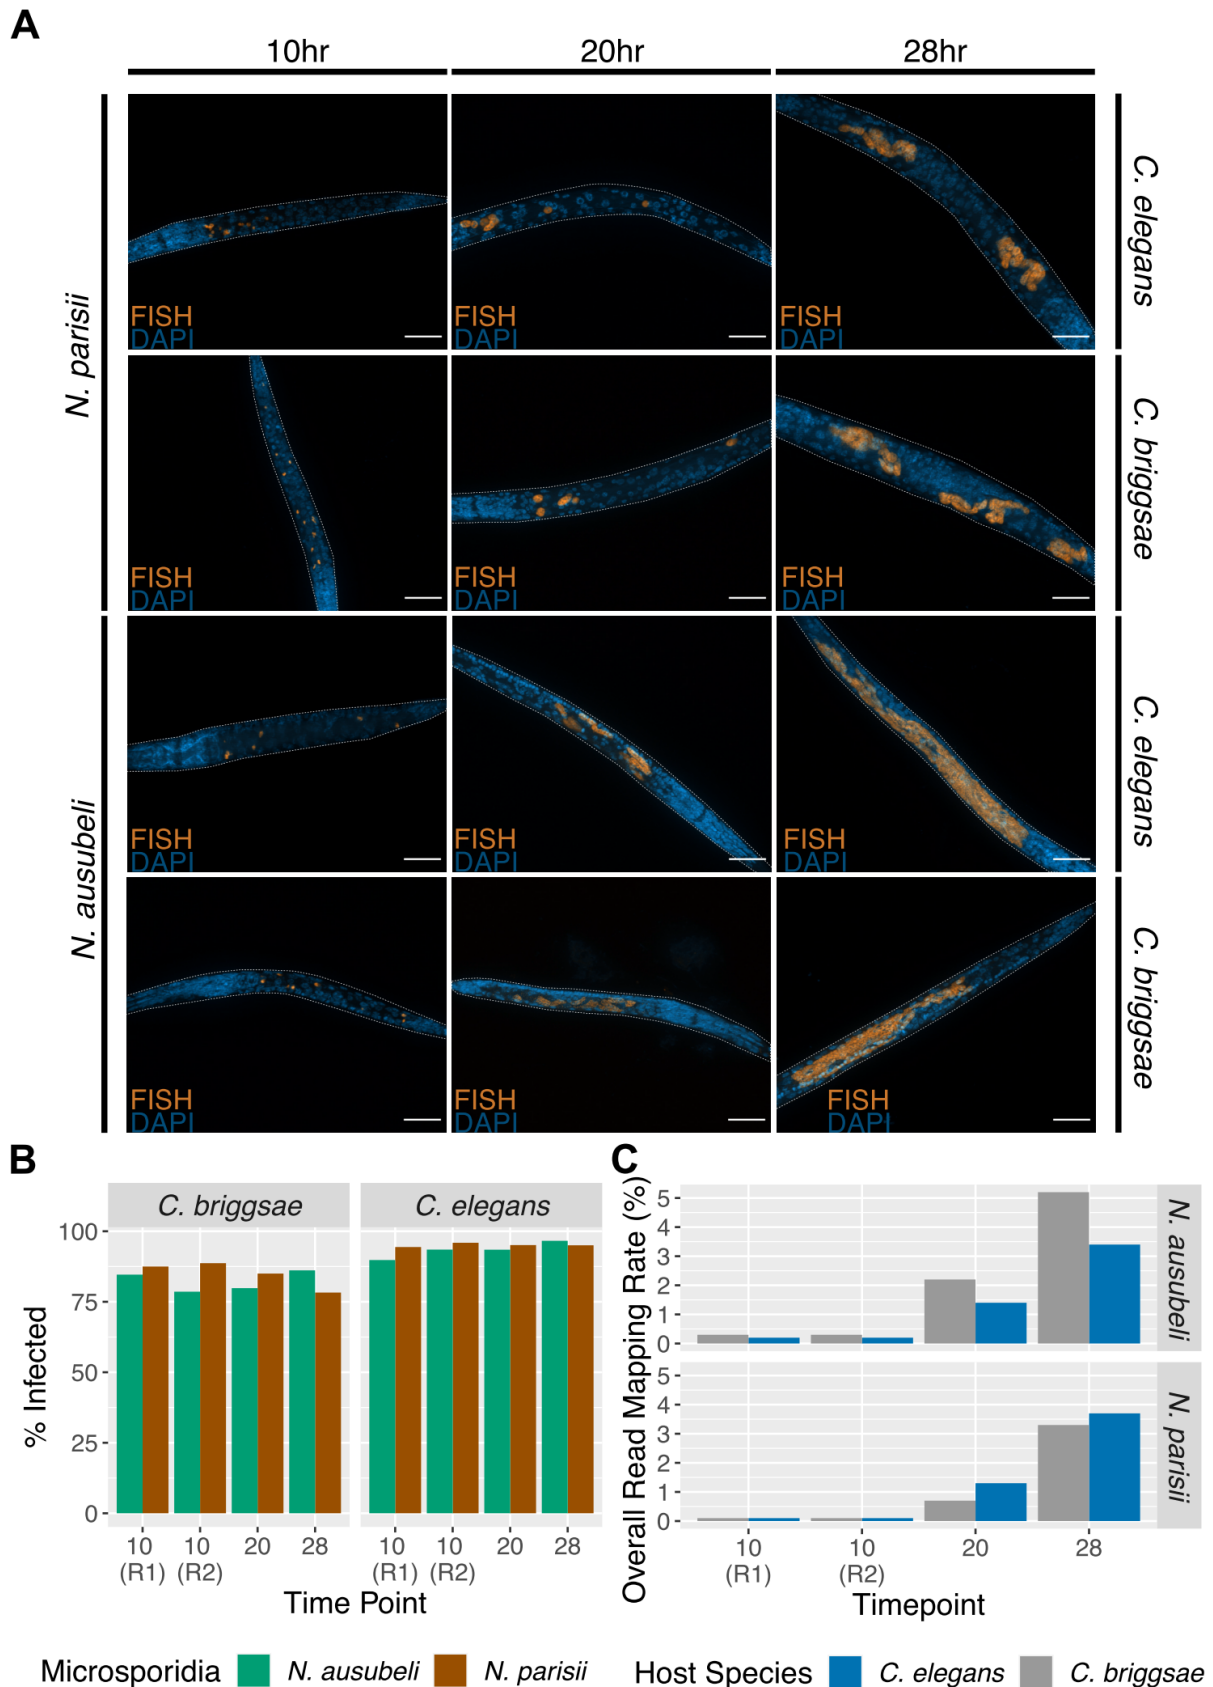

505  
506  
507  
508  
509

**Fig. 2. Nematocida infection of Caenorhabditis hosts.** (A) Pulse-infected *C. elegans* or *C. briggsae* were fixed and then stained with DAPI to detect nuclei and a FISH probe specific to *Nematocida* 18S rRNA to detect either *N. parisi* or *N. ausubeli* at 10, 20 and 28 hours after

510 infection. Representative images of infection are shown. Scale bars are 23  $\mu\text{m}$ . (B) Percentage  
511 of infected animals at different timepoints. Between 39 to 220 animals were counted for each  
512 sample. (C) Overall read mapping rate of *Nematocida* in each host at different time points. R1  
513 or R2 indicates the replicate samples at the 10-hour timepoint.  
514

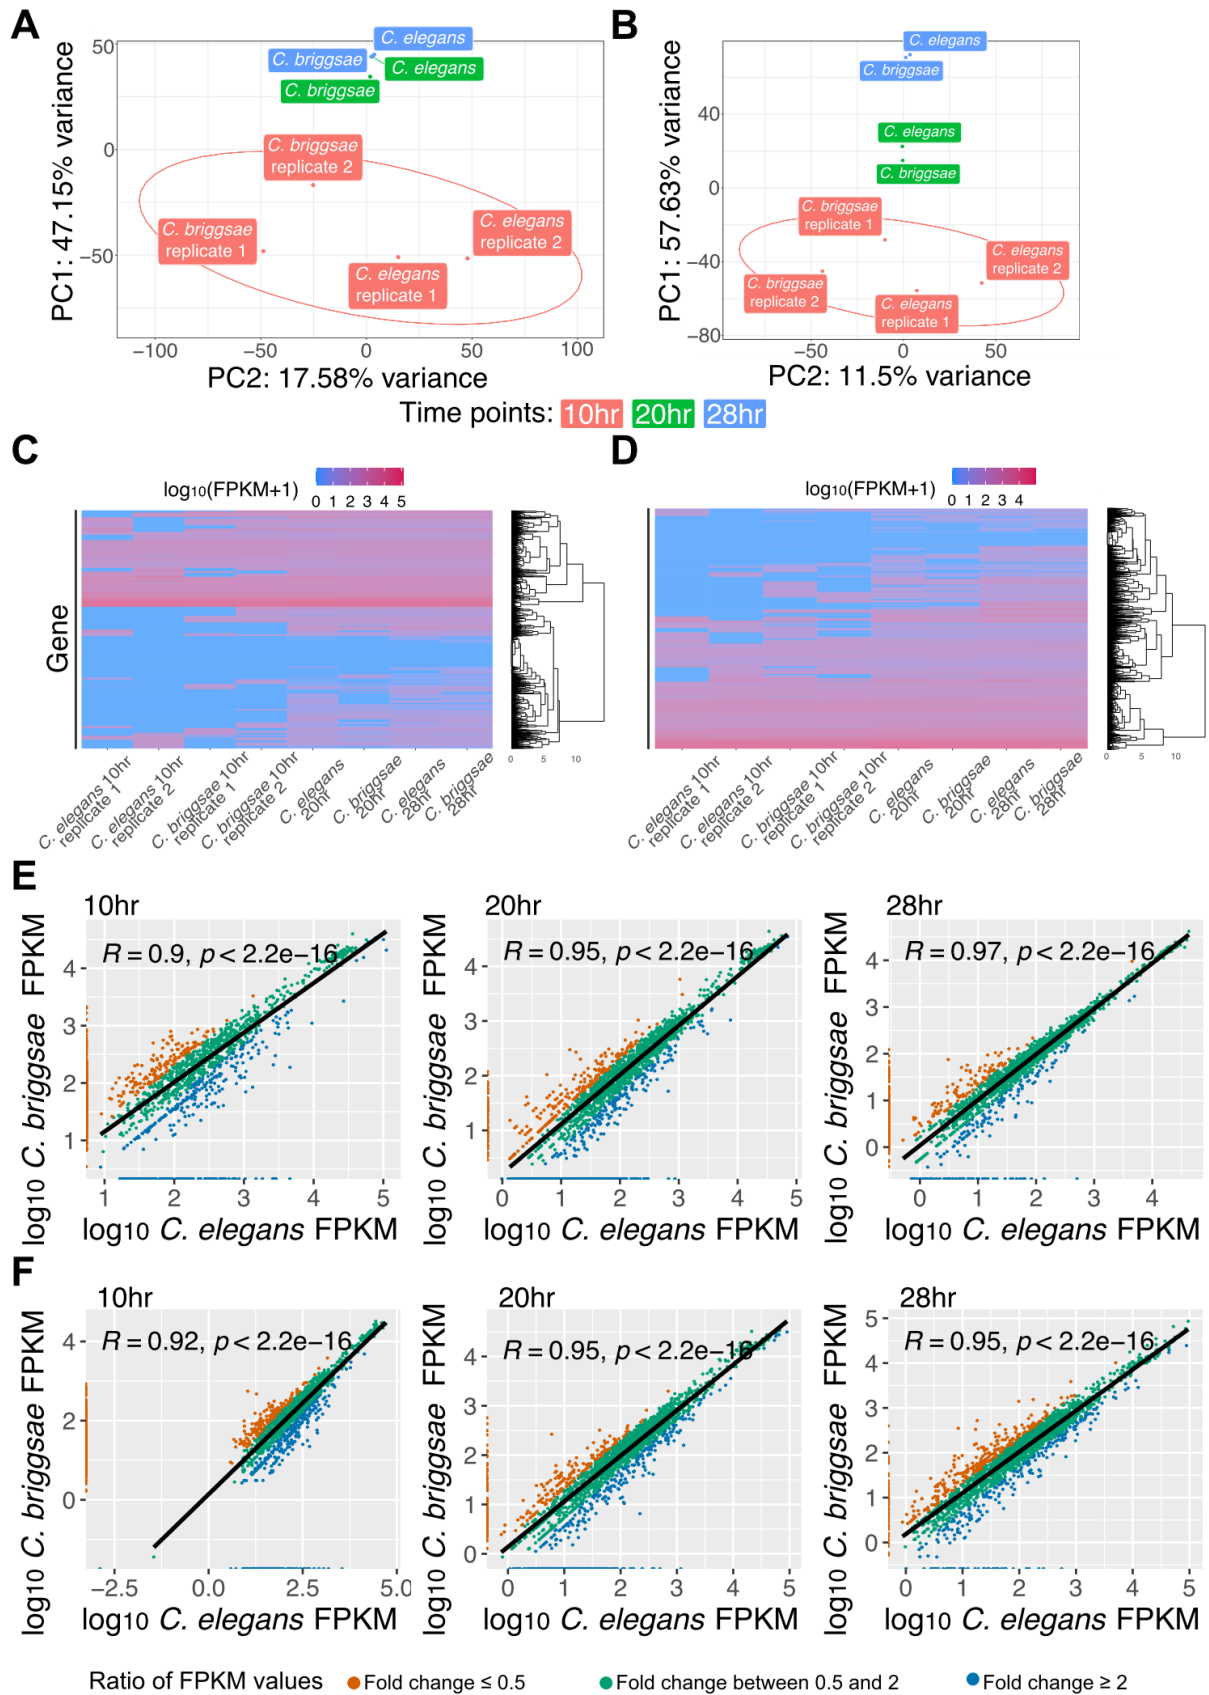

515  
516  
517  
518  
519

**Fig. 3. Microsporidia gene expression in different host species.** Principal component analysis of (A) *N. parisii* and (B) *N. ausubeli* in *C. elegans* and *C. briggsae* at 10, 20 and 28 hours. Circles represent confidence ellipses around each strain at 95% confidence interval.

520 (C-D) Heatmap of transcriptional profiles of genes expressed in *N. parisii* (C) and *N. ausubeli*  
521 (D). Rows represent gene clustered hierarchically. Scale is of differential regulation of infected  
522 compared to uninfected samples. (E-F) Scatterplot of log<sub>10</sub> FPKM values in *N. parisii* (E) and  
523 *N. ausubeli* (F) when infecting *C. briggsae* and *C. elegans*. Each point represents a  
524 microsporidian gene. Pearson correlation value and p-value are indicated on the top left of  
525 each plot. The ratio of FPKM values for each gene between *C. elegans* and *C. briggsae* is  
526 demonstrated by the colour of the points, which is described in the legend at the bottom.  
527  
528

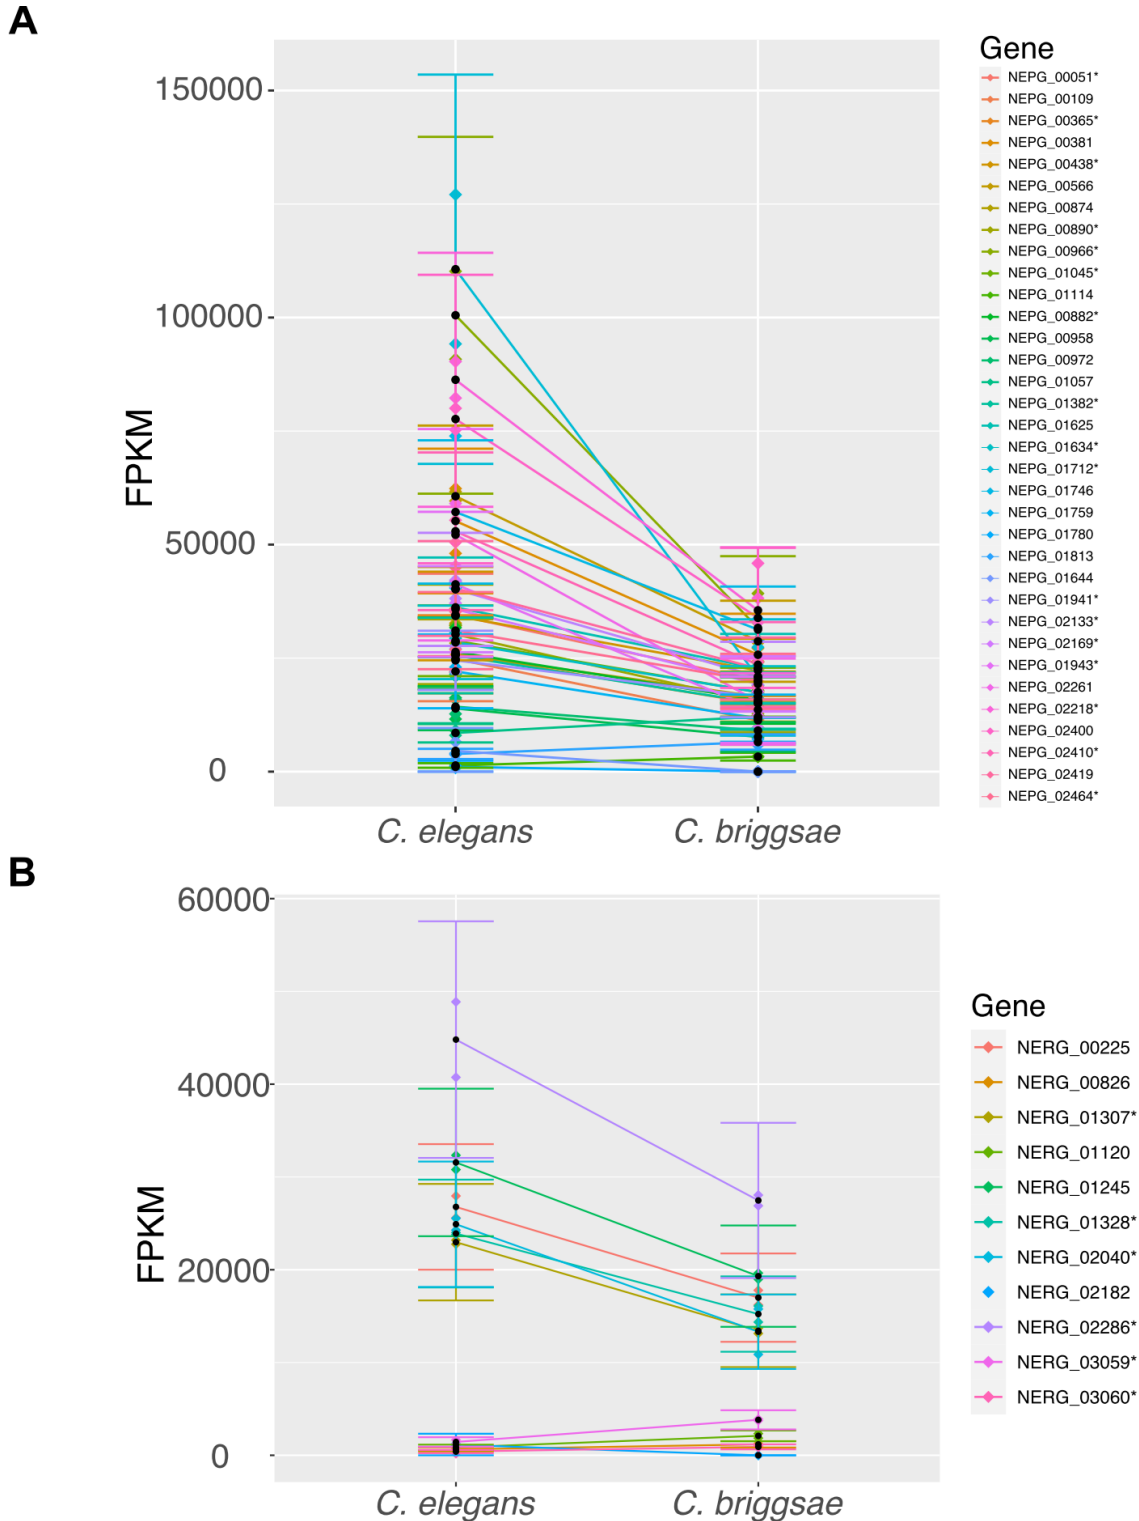

529



530 **Fig. 4. Differentially regulated genes of microsporidia.** (A-B) Line plots of the FPKM values  
531 with confidence intervals, calculated for the differentially regulated genes (FDR<0.05) in *N.*  
532 *parisii* (A) and *N. ausubeli* (B) at 10 hours post infection. \* indicates ribosomal protein-  
533 encoding genes. The aggregate sample value of the two replicates is noted as a black dot  
534 within the confidence interval, while the value for each replicate is shown as a dot of matching  
535 colour along the confidence interval. Error bars of each gene show the variability of the  
536 distribution of FPKM values.  
537  
538

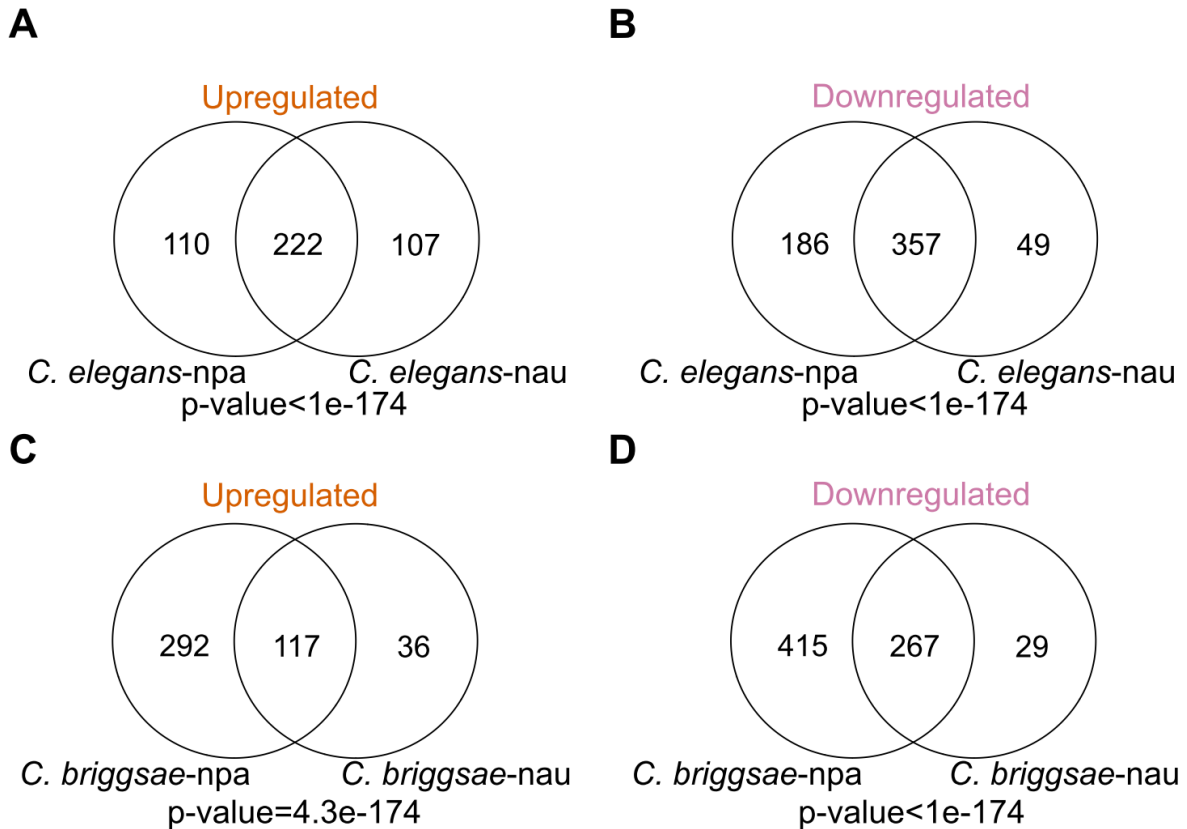

539  
540  
541 **Fig. 5. Transcriptional responses of *Caenorhabditis* hosts to *Nematocida* infection.** (A-  
542 D) Venn diagrams of genes in *C. elegans* (A-B) or *C. briggsae* (C-D) that are upregulated (A  
543 and C) or downregulated (B and D) when infected by *N. parisii* or *N. ausubeli*. npa (*N. parisii*)  
544 and nau (*N. ausubeli*).  
545  
546

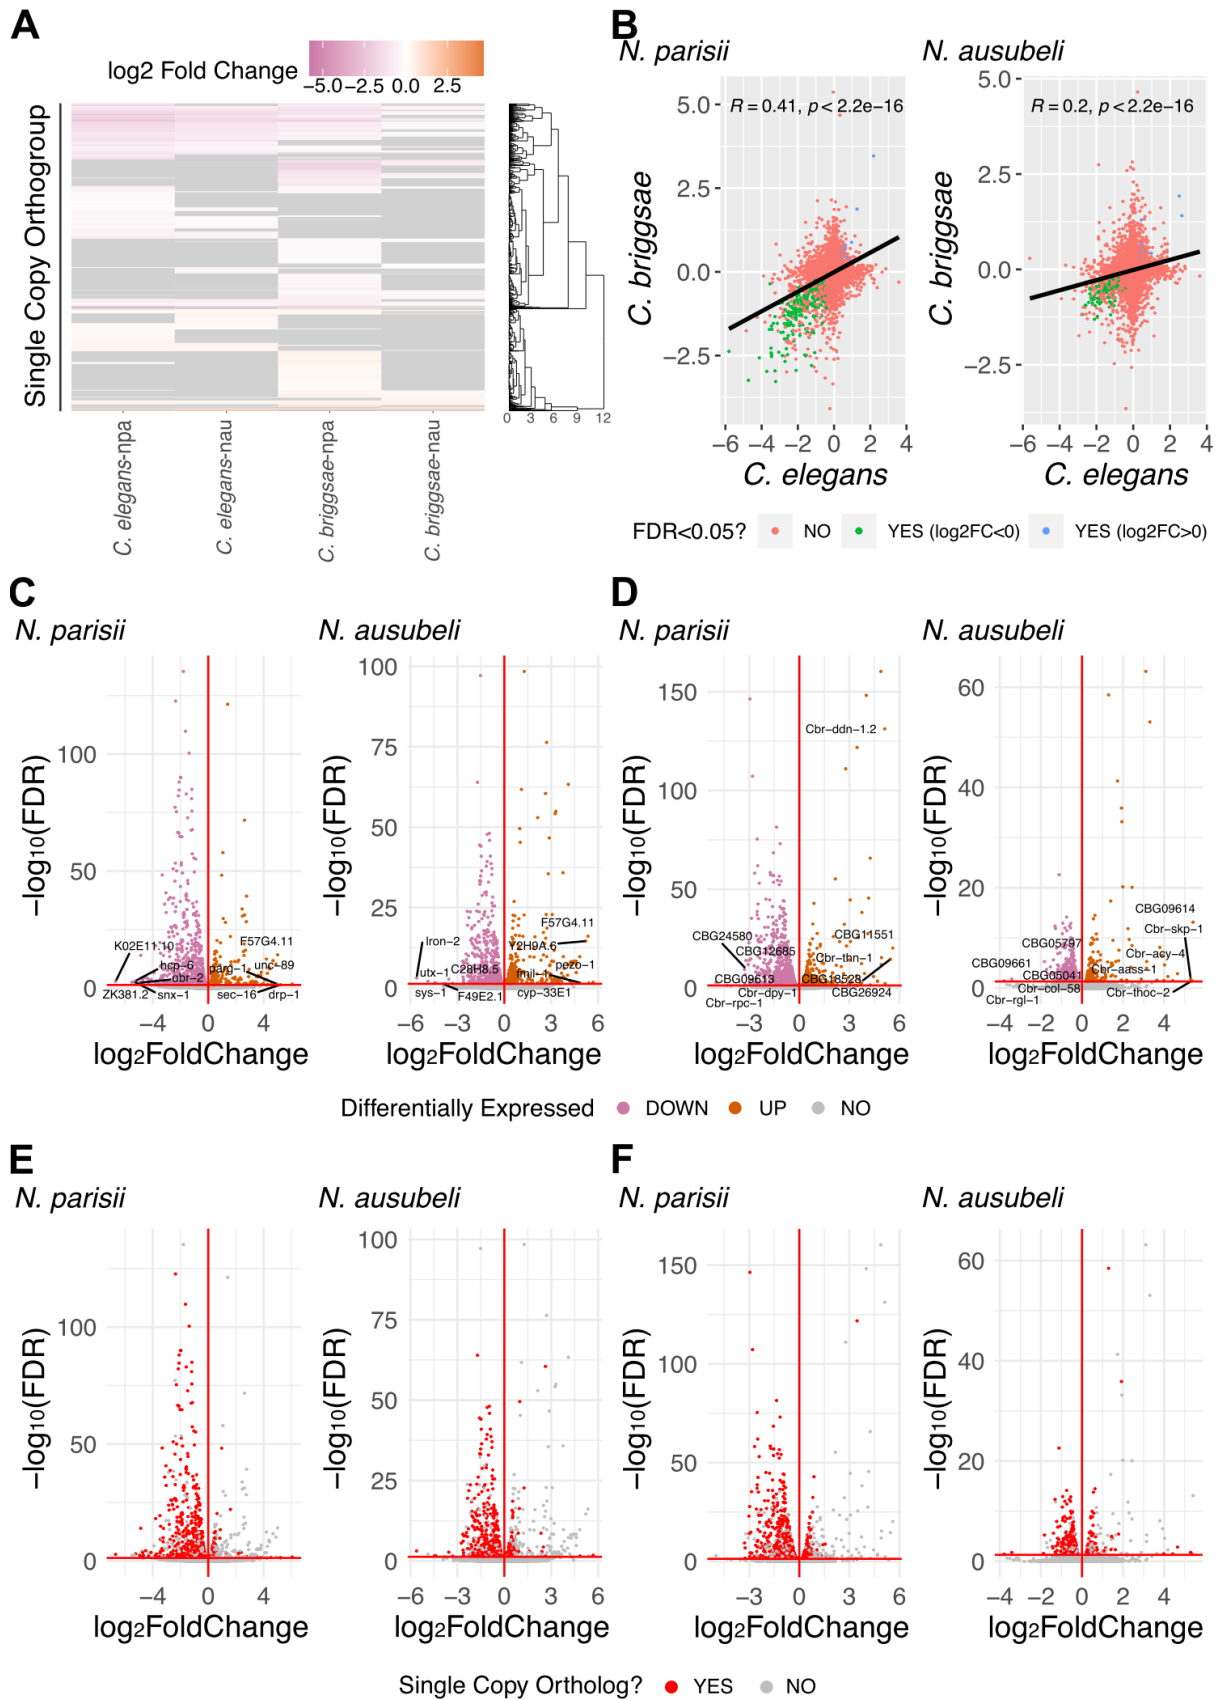

547  
548  
549  
550  
551

**Fig. 6. Transcriptional responses of single copy orthologs in *Caenorhabditis* hosts to *Nematocida* infection.** (A) Heatmap of transcriptional profiles of single-copy orthologs in *C. elegans* and *C. briggsae* after infection by *N. parisii* or *N. ausubeli*. Rows represent genes clustered hierarchically. Scale is of differential regulation of infected compared to uninfected

552 samples. **(B)** Scatterplot of log<sub>2</sub> fold change values of single-copy orthologs expressed in *C.*  
553 *elegans* and *C. briggsae*. Each point represents a single-copy ortholog between the two host  
554 species. Pearson correlation values and p-values are indicated on top left of each plot. The  
555 ratio of log<sub>2</sub> fold change values for each single copy ortholog between *C. elegans* and *C.*  
556 *briggsae* is demonstrated by the colour of the points. (C-D) Volcano plots of genes expressed  
557 in *Nematocida* infected *C. elegans* (C) and *C. briggsae* (D). Upregulated genes are  
558 represented with orange points; downregulated genes are represented with pink points. The  
559 top 5 upregulated and downregulated genes are labelled. (E-F) Volcano plots of genes  
560 expressed in *Nematocida* infected *C. elegans* (E) and *C. briggsae* (F). Single-copy orthologs  
561 are represented with red points and non-single copy orthologs represented with grey points.  
562 npa (*N. parisii*) and nau (*N. ausubeli*).  
563  
564

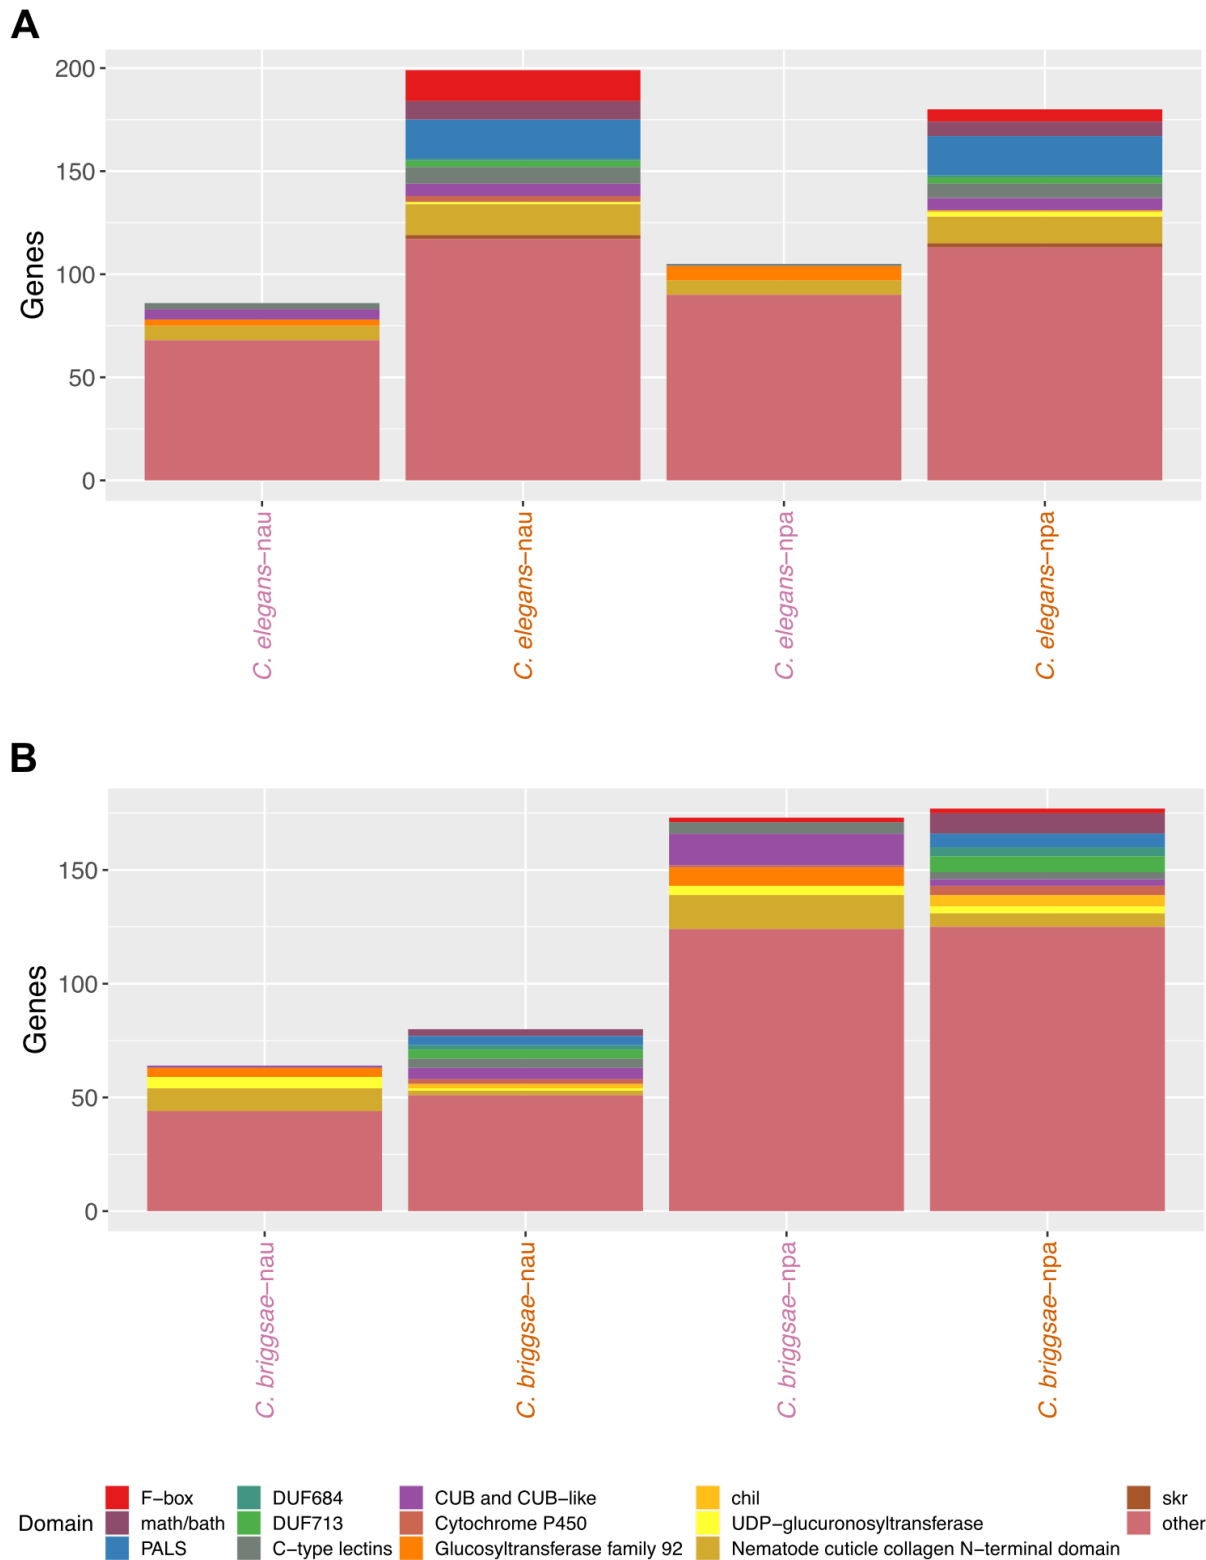

565  
566  
567  
568  
569  
570  
571

**Fig. 7. Transcriptional responses of non-single copy orthologs in *Caenorhabditis* hosts to *Nematocida* infection.** Domain enrichment analysis of significantly upregulated and downregulated non-single copy ortholog genes in *C. elegans* (A) and *C. briggsae* (B). npa (*N. parisii*) and nau (*N. ausubeli*). Upregulated samples are represented with orange text; downregulated samples are represented with pink text.





579

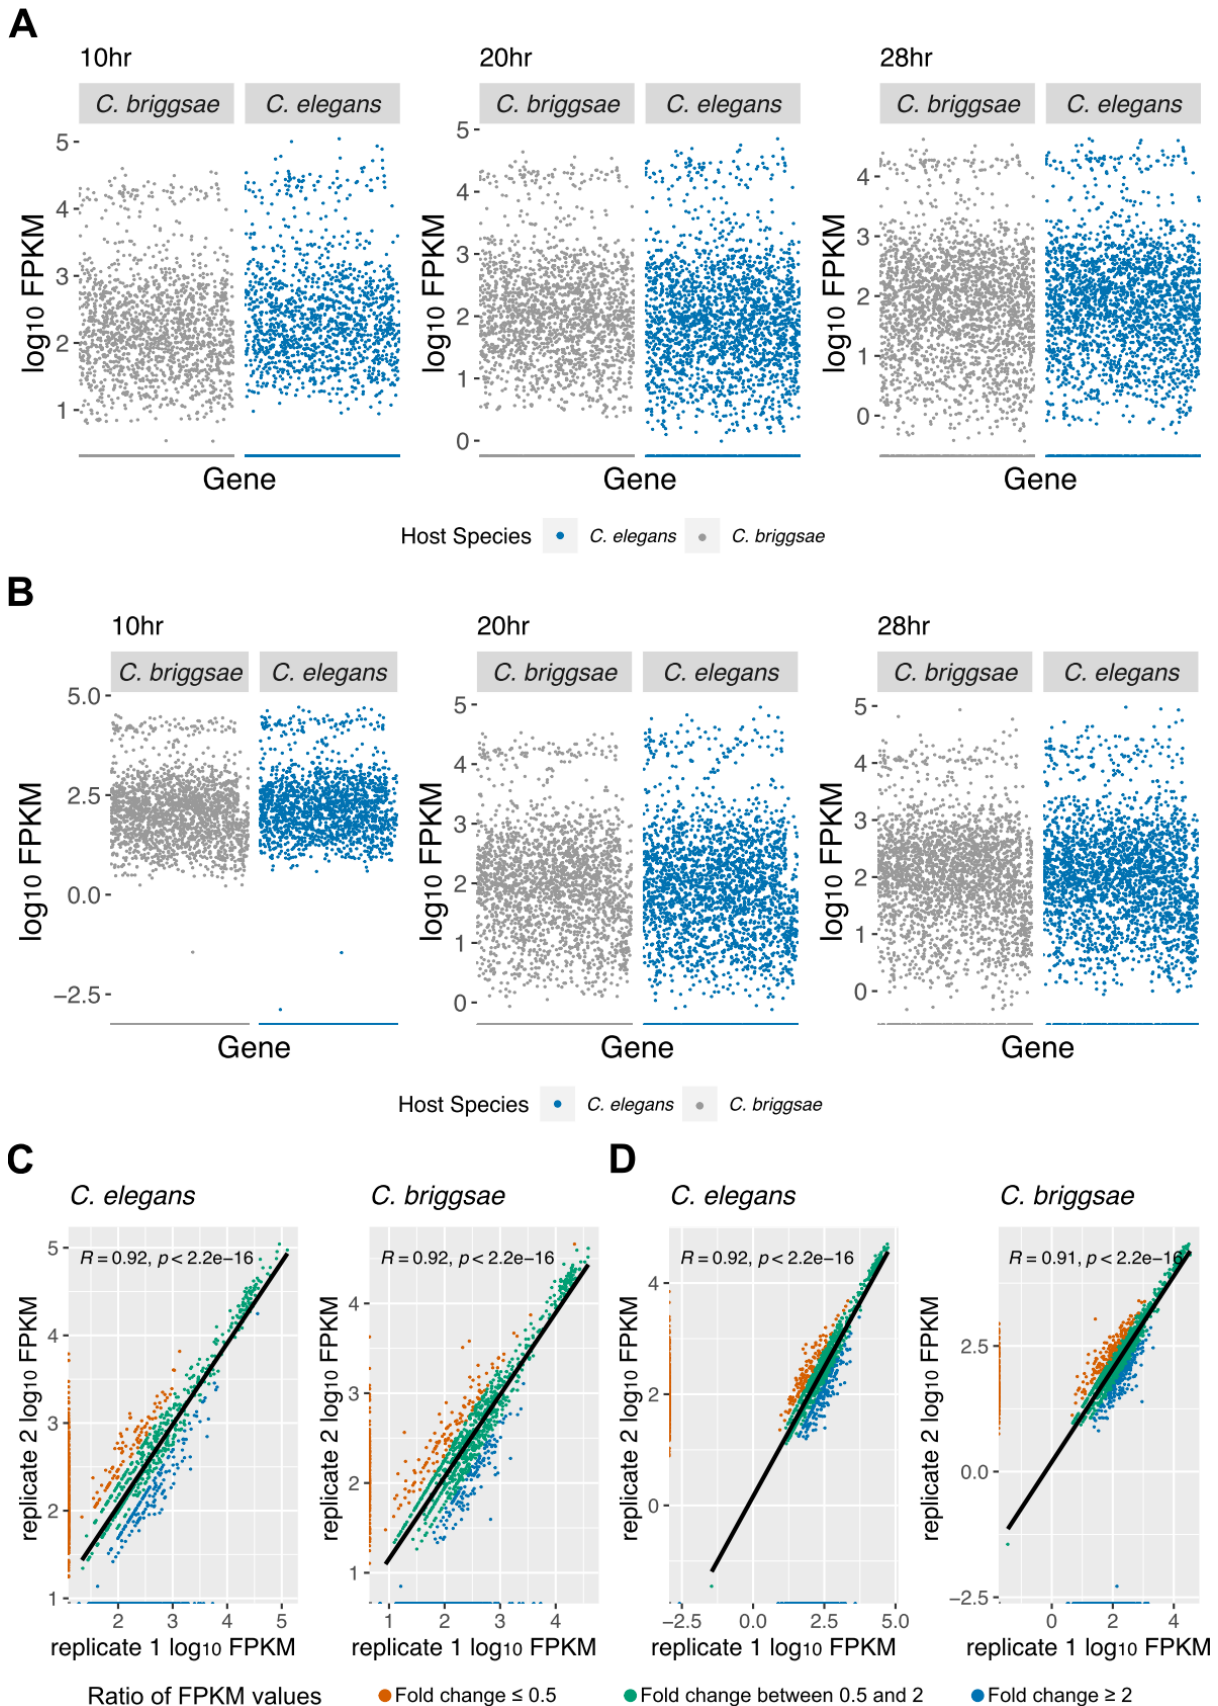

580

581

582

583

**Fig. S1. Transcriptional response of *Nematocida* species in *Caenorhabditis* hosts. (A-B) Scatterplot of *N. parisii* (A) and *N. ausubeli* (B) log<sub>10</sub> FPKM values between *C. briggsae* and *C. elegans* replicates at 10 hours. Pearson correlation values and p-values are indicated**

584 on the top left of each plot. The ratio of FPKM values for each gene between the replicates is  
585 demonstrated by the colour of the points. (C-D) Gene expression pattern of *N. parisii* (C) and  
586 *N. ausubeli* (D) in *C. elegans* and *C. briggsae*.  
587  
588

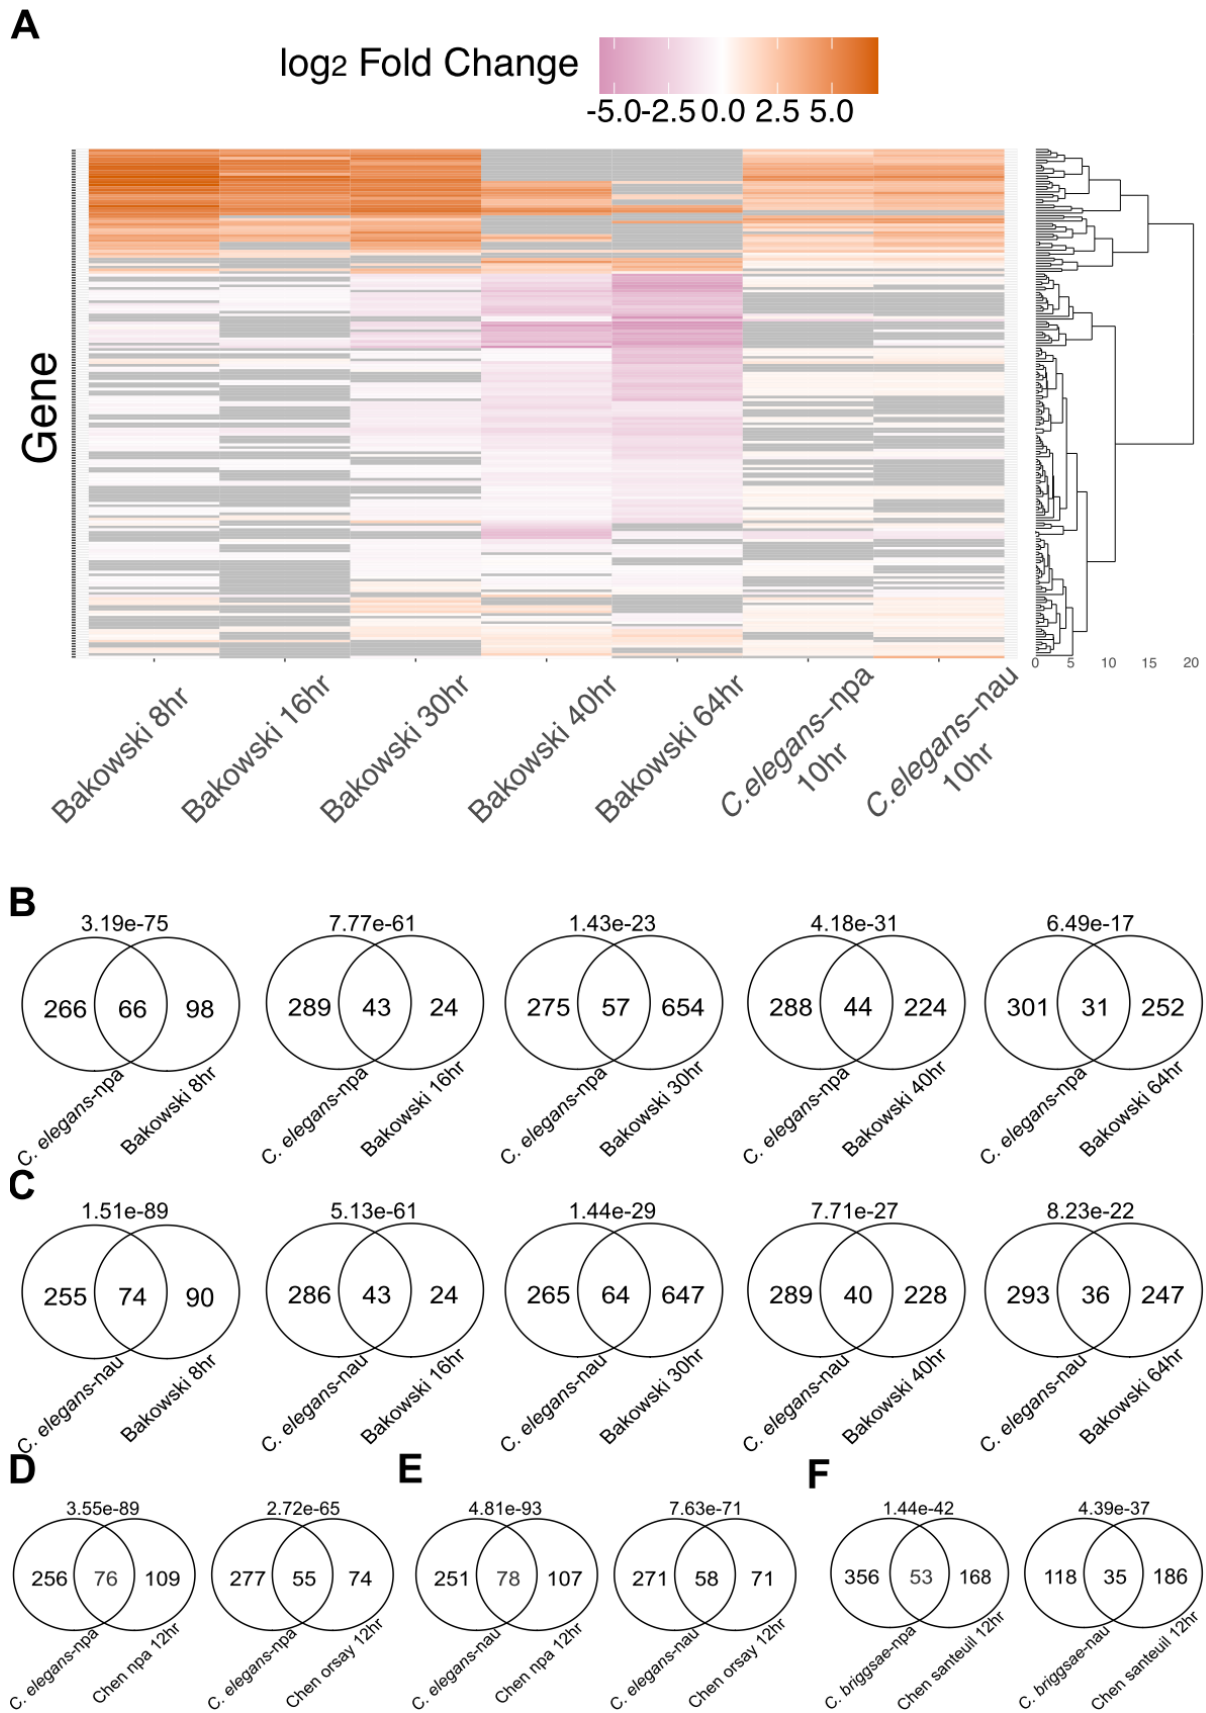

589  
590  
591  
592  
593

**Fig. S2. Data from this study has high overlap with previously published intracellular infection samples.** (A) Heatmap of transcriptional profiles of differentially regulated genes (FDR<0.05) across five samples from Bakowski *et al.* and our 10hr *N. parisii* and *N. ausubeli* infected *C. elegans* samples. Only genes expressed in at least four out of the eight total



594 samples are included. (B-C) Statistical overlap of significant genes between respective *N.*  
595 *parisii* or *N. ausinger* infected *C. elegans* samples and Bakowski *et al.* samples across five  
596 timepoints. (D-E) Statistical overlap of significant genes between *N. parisii* (D) or *N. ausinger*  
597 (E) infected *C. elegans* samples and Chen *et al.* Orsay virus infected *C. elegans* sample at 12  
598 hours. (F) Statistical overlap of significant genes between respective *N. parisii* or *N. ausinger*  
599 infected *C. briggsae* sample and Chen *et al.* Santeuil virus infected *C. briggsae* sample at 12  
600 hours. The p-value of each comparison is indicated on top of each Venn diagram. npa (*N.*  
601 *parisii*) and nau (*N. ausinger*).  
602  
603

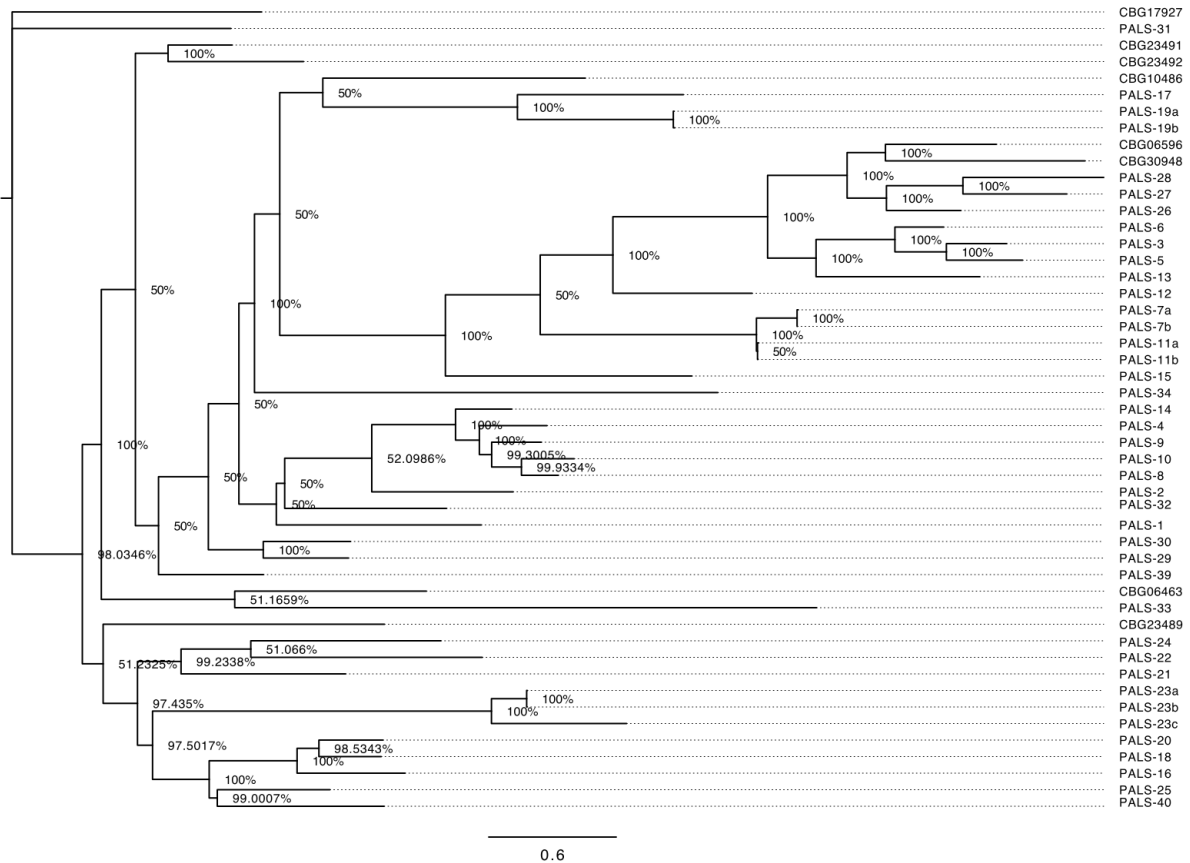

604  
605 **Fig. S3. Phylogram of *C. elegans* and *C. briggsae* PALS family genes.** Genes with the  
606 same name that end with different letters indicate protein isoforms. Node values indicate  
607 posterior probabilities for each split as percentage. The scale bar indicates average branch  
608 length measured in expected substitutions per site.  
609  
610

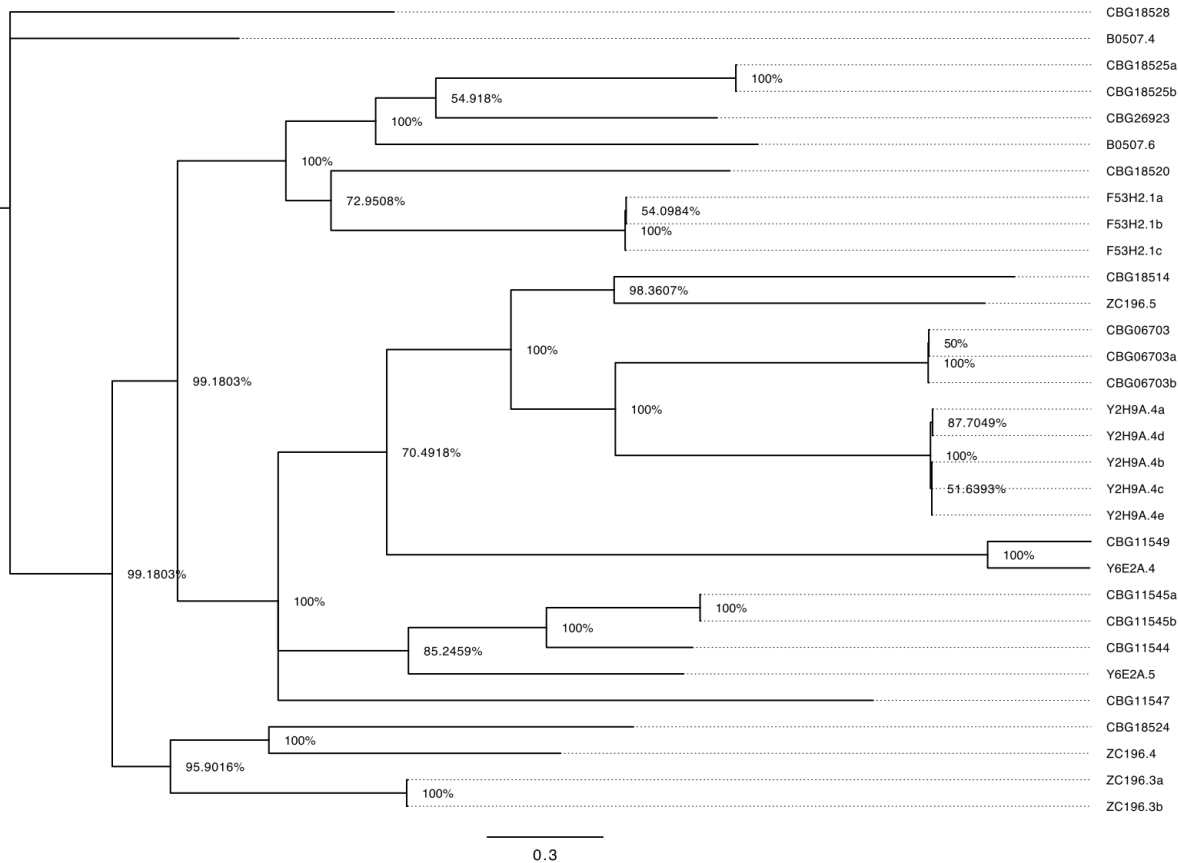

611  
 612 **Fig. S4. Phylogram of *C. elegans* and *C. briggsae* DUF713 family genes.** Genes with the  
 613 same name that end with different letters indicate protein isoforms. Node values indicate  
 614 posterior probabilities for each split as percentage. The scale bar indicates average branch  
 615 length measured in expected substitutions per site.

616  
 617  
 618  
 619  
 620

621 **Supplementary Table and Materials**

622 **Supplementary Table S1. FPKM values of gene expression and differentially expressed**  
 623 **microsporidia genes.**

624  
 625 **Supplementary Table S2. Normalised RNA-seq counts of the *C. elegans* and *C. briggsae***  
 626 **for the transcriptional analysis generated by Alaska.**

627  
 628  
 629 **Supplementary Table S3. Differentially expressed genes of *C. elegans* and *C. briggsae***  
 630 **exposed to the two species of microsporidia generated by Alaska.**

631  
 632 **Supplementary Table S4. PANTHER GO enrichment analyses.** Sheet S1 contains results  
 633 of the statistical enrichment tests of the 222 significantly upregulated genes shared between  
 634 *N. parisii* and *N. ausinger* infected *C. elegans*. Sheet S2 contains results of the statistical  
 635 enrichment tests of the 267 significantly downregulated genes shared between *N. parisii* and  
 636 *N. ausinger* infected *C. briggsae*. Sheet S3 contains results of the statistical enrichment tests  
 637 of the 415 significantly downregulated genes specifically in *N. parisii* infected *C. briggsae*.

638  
 639 **Supplementary Table S5. List of gene set overlaps with previously published infection**  
 640 **samples.**

641  
642  
643  
644

**Supplementary Table S6. Gene classes and domains used for enrichment analyses.**

| Domain/ Gene Family                                                      | Databse  | Wormbase gene class OR Pfam ID |
|--------------------------------------------------------------------------|----------|--------------------------------|
| F-box                                                                    | Wormbase | fbxa, fbxb, fbxc               |
| MATH (mepirin or Traf homology) or BATH (BTB and MATH domain-containing) | Wormbase | math, bath                     |
| PALS (protein containing ALS2CR12 signature)                             | Wormbase | pals                           |
| C-type lectins                                                           | Wormbase | clcc                           |
| DUF713                                                                   | Pfam     | PF015218                       |
| DUF684                                                                   | Pfam     | PF05075                        |
| chil                                                                     | Wormbase | chil                           |
| Nematode cuticle collagen N-terminal domain                              | Pfam     | PF01484                        |
| CUB and CUB-like                                                         | Pfam     | PF00431, PF02408               |
| Cytochrome P450                                                          | Wormbase | cyp                            |
| Glucosyltransferase family 92                                            | Pfam     | PF00201                        |
| UDP-glucuronosyltransferase                                              | Wormbase | ugt                            |
| skr (Skr1-related)                                                       | Wormbase | Skr                            |
| Other (Any genes not in the domain or gene family above)                 | -        | -                              |

645

**References**

646

647 Bakowski, M.A. *et al.* (2014) 'Ubiquitin-Mediated Response to Microsporidia and Virus  
648 Infection in *C. elegans*', *PLoS Pathogens*. Edited by D.S. Schneider, 10(6), p. e1004200.  
649 doi:10.1371/journal.ppat.1004200.

650

651 Balla, K.M. *et al.* (2016) 'Cell-to-cell spread of microsporidia causes *Caenorhabditis elegans*  
652 organs to form syncytia', *Nature Microbiology*, 1(11), p. 16144.  
doi:10.1038/nmicrobiol.2016.144.

653

654 Barrière, A. and Félix, M.-A. (2005) 'High Local Genetic Diversity and Low Outcrossing Rate in  
655 *Caenorhabditis elegans* Natural Populations', *Current Biology*, 15(13), pp. 1176–1184.  
doi:10.1016/j.cub.2005.06.022.

656

657 Bojko, J. *et al.* (2022) 'Microsporidia: a new taxonomic, evolutionary, and ecological  
synthesis', *Trends in Parasitology*, 0(0). doi:10.1016/j.pt.2022.05.007.

658

659 Bray, N.L. *et al.* (2016) 'Near-optimal probabilistic RNA-seq quantification', *Nature  
Biotechnology*, 34(5), pp. 525–527. doi:10.1038/nbt.3519.

660

661 Burton, N.O. *et al.* (2021) 'Intergenerational adaptations to stress are evolutionarily  
662 conserved, stress-specific, and have deleterious trade-offs.', *eLife*, 10.  
doi:10.7554/eLife.73425.

663

664 Chen, K. *et al.* (2017) 'An evolutionarily conserved transcriptional response to viral infection  
665 in *Caenorhabditis nematodes*', *BMC Genomics*, 18(1), p. 303. doi:10.1186/s12864-017-3689-  
3.

- 666 Conesa, A. *et al.* (2016) 'A survey of best practices for RNA-seq data analysis', *Genome*  
667 *Biology*, 17(1), p. 13. doi:10.1186/s13059-016-0881-8.
- 668 Cuomo, C.A. *et al.* (2012) 'Microsporidian genome analysis reveals evolutionary strategies  
669 for obligate intracellular growth', *Genome Research*, 22(12), pp. 2478–2488.  
670 doi:10.1101/gr.142802.112.
- 671 Desjardins, C.A. *et al.* (2015) 'Contrasting host-pathogen interactions and genome evolution  
672 in two generalist and specialist microsporidian pathogens of mosquitoes.', *Nature*  
673 *communications*, 6, p. 7121. doi:10.1038/ncomms8121.
- 674 Di Tommaso, P. *et al.* (2011) 'T-Coffee: a web server for the multiple sequence alignment of  
675 protein and RNA sequences using structural information and homology extension', *Nucleic*  
676 *Acids Research*, 39(suppl), pp. W13–W17. doi:10.1093/nar/gkr245.
- 677 Eddy, S.R. (2011) 'Accelerated Profile HMM Searches', *PLOS Computational Biology*, 7(10), p.  
678 e1002195. doi:10.1371/journal.pcbi.1002195.
- 679 Emms, D.M. and Kelly, S. (2019) 'OrthoFinder: phylogenetic orthology inference for  
680 comparative genomics', *Genome Biology*, 20(1), p. 238. doi:10.1186/s13059-019-1832-y.
- 681 Engelmann, I. *et al.* (2011) 'A comprehensive analysis of gene expression changes provoked  
682 by bacterial and fungal infection in *C. elegans*.', *PloS one*, 6(5), p. e19055.  
683 doi:10.1371/journal.pone.0019055.
- 684 Ewels, P. *et al.* (2016) 'MultiQC: summarize analysis results for multiple tools and samples in  
685 a single report', *Bioinformatics*, 32(19), pp. 3047–3048. doi:10.1093/bioinformatics/btw354.
- 686 Flores, J. *et al.* (2021) 'Human microsporidian pathogen *Encephalitozoon intestinalis*  
687 impinges on enterocyte membrane trafficking and signaling', *Journal of Cell Science*, 134(5),  
688 p. jcs253757. doi:10.1242/jcs.253757.
- 689 Grover, M. *et al.* (2021) 'Infection of *C. elegans* by Haptoglossa Species Reveals Shared  
690 Features in the Host Response to Oomycete Detection', *Frontiers in Cellular and Infection*  
691 *Microbiology*, 11, p. 973. doi:10.3389/fcimb.2021.733094.
- 692 Haag, K.L. *et al.* (2014) 'Evolution of a morphological novelty occurred before genome  
693 compaction in a lineage of extreme parasites', *Proceedings of the National Academy of*  
694 *Sciences*, 111(43), pp. 15480–15485. doi:10.1073/pnas.1410442111.
- 695 Huang, D.W., Sherman, Brad T. and Lempicki, R.A. (2009) 'Bioinformatics enrichment tools:  
696 paths toward the comprehensive functional analysis of large gene lists', *Nucleic Acids*  
697 *Research*, 37(1), pp. 1–13. doi:10.1093/nar/gkn923.
- 698 Huang, D.W., Sherman, Brad T and Lempicki, R.A. (2009) 'Systematic and integrative analysis  
699 of large gene lists using DAVID bioinformatics resources', *Nature Protocols*, 4(1), pp. 44–57.  
700 doi:10.1038/nprot.2008.211.

- 701 Huelsenbeck, J.P. and Ronquist, F. (2001) 'MRBAYES: Bayesian inference of phylogenetic  
702 trees', *Bioinformatics*, 17(8), pp. 754–755. doi:10.1093/bioinformatics/17.8.754.
- 703 James, T.Y. *et al.* (2013) 'Shared Signatures of Parasitism and Phylogenomics Unite  
704 Cryptomycota and Microsporidia', *Current Biology*, 23(16), pp. 1548–1553.  
705 doi:10.1016/j.cub.2013.06.057.
- 706 Katinka, M.D. *et al.* (2001) 'Genome sequence and gene compaction of the eukaryote  
707 parasite *Encephalitozoon cuniculi*.' *Nature*, 414(6862), pp. 450–453. doi:10.1038/35106579.
- 708 L. Goff, C.T. (2017) *Cummerbund: analysis, exploration, manipulation, and visualization of*  
709 *cufflinks high-throughput sequencing data*. Bioconductor.  
710 doi:10.18129/B9.BIOC.CUMMERBUND.
- 711 Langmead, B. and Salzberg, S.L. (2012) 'Fast gapped-read alignment with Bowtie 2', *Nature*  
712 *Methods*, 9(4), pp. 357–359. doi:10.1038/nmeth.1923.
- 713 Lansdon, P., Carlson, M. and Ackley, B.D. (2022) 'Wild-type *Caenorhabditis elegans* isolates  
714 exhibit distinct gene expression profiles in response to microbial infection', *BMC Genomics*,  
715 23(1), p. 229. doi:10.1186/s12864-022-08455-2.
- 716 Lažetić, V. *et al.* (2022) 'The transcription factor ZIP-1 promotes resistance to intracellular  
717 infection in *Caenorhabditis elegans*', *Nature Communications*, 13(1), p. 17.  
718 doi:10.1038/s41467-021-27621-w.
- 719 Leyva-Díaz, E. *et al.* (2017) 'Silencing of Repetitive DNA Is Controlled by a Member of an  
720 Unusual *Caenorhabditis elegans* Gene Family', *Genetics*, 207(2), pp. 529–545.  
721 doi:10.1534/genetics.117.300134.
- 722 Li, H. *et al.* (2009) 'The Sequence Alignment/Map format and SAMtools', *Bioinformatics*,  
723 25(16), pp. 2078–2079. doi:10.1093/bioinformatics/btp352.
- 724 Luallen, R.J. *et al.* (2016) 'Discovery of a Natural Microsporidian Pathogen with a Broad  
725 Tissue Tropism in *Caenorhabditis elegans*', *PLoS pathogens*, 12(6), p. e1005724.  
726 doi:10.1371/journal.ppat.1005724.
- 727 Ma, Z. *et al.* (2013) 'Genome-Wide Transcriptional Response of Silkworm (*Bombyx mori*) to  
728 Infection by the Microsporidian *Nosema bombycis*', *PLOS ONE*, 8(12), p. e84137.  
729 doi:10.1371/journal.pone.0084137.
- 730 Marini, F. and Binder, H. (2019) 'pcaExplorer: an R/Bioconductor package for interacting  
731 with RNA-seq principal components', *BMC Bioinformatics*, 20(1), p. 331.  
732 doi:10.1186/s12859-019-2879-1.
- 733 Mi, H. *et al.* (2021) 'PANTHER version 16: a revised family classification, tree-based  
734 classification tool, enhancer regions and extensive API', *Nucleic Acids Research*, 49(D1), pp.  
735 D394–D403. doi:10.1093/nar/gkaa1106.



- 736 Midttun, H.L.E. *et al.* (2020) 'Effects of Pseudoloma neurophilia infection on the brain  
737 transcriptome in zebrafish (*Danio rerio*)', *Journal of Fish Diseases*, 43(8), pp. 863–875.  
738 doi:10.1111/jfd.13198.
- 739 Murareanu, B.M. *et al.* (2021) 'Generation of a Microsporidia Species Attribute Database  
740 and Analysis of the Extensive Ecological and Phenotypic Diversity of Microsporidia', *mBio*.
- 741 Nakjang, S. *et al.* (2013) 'Reduction and expansion in microsporidian genome evolution: new  
742 insights from comparative genomics.', *Genome biology and evolution*, 5(12), pp. 2285–2303.  
743 doi:10.1093/gbe/evt184.
- 744 Notredame, C., Higgins, D.G. and Heringa, J. (2000) 'T-coffee: a novel method for fast and  
745 accurate multiple sequence alignment 1 Edited by J. Thornton', *Journal of Molecular  
746 Biology*, 302(1), pp. 205–217. doi:10.1006/jmbi.2000.4042.
- 747 Pimentel, H. *et al.* (2017) 'Differential analysis of RNA-seq incorporating quantification  
748 uncertainty', *Nature Methods*, 14(7), pp. 687–690. doi:10.1038/nmeth.4324.
- 749 Quandt, C.A. *et al.* (2017) 'The genome of an intranuclear parasite, Paramicrosporidium  
750 saccamoebae, reveals alternative adaptations to obligate intracellular parasitism', *eLife*.  
751 Edited by A. Rokas, 6, p. e29594. doi:10.7554/eLife.29594.
- 752 Reddy, K.C. *et al.* (2017) 'An Intracellular Pathogen Response Pathway Promotes  
753 Proteostasis in *C. elegans*', *Current biology: CB*, 27(22), pp. 3544-3553.e5.  
754 doi:10.1016/j.cub.2017.10.009.
- 755 Reddy, K.C. *et al.* (2019) 'Antagonistic paralogs control a switch between growth and  
756 pathogen resistance in *C. elegans*', *PLoS pathogens*, 15(1), p. e1007528.  
757 doi:10.1371/journal.ppat.1007528.
- 758 Reinke, A.W. *et al.* (2017) 'Identification of microsporidia host-exposed proteins reveals a  
759 repertoire of rapidly evolving proteins.', *Nature communications*, 8, p. 14023.  
760 doi:10.1038/ncomms14023.
- 761 Ronquist, F. and Huelsenbeck, J.P. (2003) 'MrBayes 3: Bayesian phylogenetic inference  
762 under mixed models', *Bioinformatics*, 19(12), pp. 1572–1574.  
763 doi:10.1093/bioinformatics/btg180.
- 764 Sinha, A. *et al.* (2012) 'System Wide Analysis of the Evolution of Innate Immunity in the  
765 Nematode Model Species *Caenorhabditis elegans* and *Pristionchus pacificus*', *PLOS ONE*,  
766 7(9), p. e44255. doi:10.1371/journal.pone.0044255.
- 767 Sowa, J.N. *et al.* (2019) 'The *Caenorhabditis elegans* RIG-I Homolog DRH-1 Mediates the  
768 Intracellular Pathogen Response upon Viral Infection', *Journal of Virology* [Preprint].  
769 doi:10.1128/JVI.01173-19.
- 770 Stein, L.D. *et al.* (2003) 'The genome sequence of *Caenorhabditis briggsae*: a platform for  
771 comparative genomics.', *PLoS biology*, 1(2), p. E45. doi:10.1371/journal.pbio.0000045.

- 772 Stentiford, G.D. *et al.* (2016) 'Microsporidia – Emergent Pathogens in the Global Food  
773 Chain', *Trends in Parasitology*, 32(4), pp. 336–348. doi:10.1016/j.pt.2015.12.004.
- 774 Szumowski, S.C. and Troemel, E.R. (2015) 'Microsporidia–host interactions', *Current Opinion  
775 in Microbiology*, 26, pp. 10–16. doi:10.1016/j.mib.2015.03.006.
- 776 Tamim El Jarkass, H. and Reinke, A.W. (2020) 'The ins and outs of host-microsporidia  
777 interactions during invasion, proliferation and exit', *Cellular Microbiology*, 22(11).  
778 doi:10.1111/cmi.13247.
- 779 Tecle, E. *et al.* (2021) 'The purine nucleoside phosphorylase pnp-1 regulates epithelial cell  
780 resistance to infection in *C. elegans*', *PLOS Pathogens*, 17(4), p. e1009350.  
781 doi:10.1371/journal.ppat.1009350.
- 782 Tecle, E. and Troemel, E.R. (2022) 'Insights from *C. elegans* into Microsporidia Biology and  
783 Host-Pathogen Relationships.', *Experientia supplementum (2012)*, 114, pp. 115–136.  
784 doi:10.1007/978-3-030-93306-7\_5.
- 785 Thomas, J.H. (2006) 'Adaptive evolution in two large families of ubiquitin-ligase adapters in  
786 nematodes and plants', *Genome Research*, 16(8), pp. 1017–1030. doi:10.1101/gr.5089806.
- 787 Trapnell, C. *et al.* (2010) 'Transcript assembly and quantification by RNA-Seq reveals  
788 unannotated transcripts and isoform switching during cell differentiation', *Nature  
789 Biotechnology*, 28(5), pp. 511–515. doi:10.1038/nbt.1621.
- 790 Trapnell, C. *et al.* (2013) 'Differential analysis of gene regulation at transcript resolution with  
791 RNA-seq', *Nature Biotechnology*, 31(1), pp. 46–53. doi:10.1038/nbt.2450.
- 792 Trapnell, C., Pachter, L. and Salzberg, S.L. (2009) 'TopHat: discovering splice junctions with  
793 RNA-Seq', *Bioinformatics*, 25(9), pp. 1105–1111. doi:10.1093/bioinformatics/btp120.
- 794 Troemel, E.R. *et al.* (2008) 'Microsporidia are natural intracellular parasites of the nematode  
795 *Caenorhabditis elegans*.' *PLoS biology*, 6(12), pp. 2736–2752.  
796 doi:10.1371/journal.pbio.0060309.
- 797 Vávra, J. and Lukeš, J. (2013) 'Chapter Four - Microsporidia and "The Art of Living Together"',  
798 in Rollinson, D. (ed.) *Advances in Parasitology*. Academic Press, pp. 253–319.  
799 doi:10.1016/B978-0-12-407706-5.00004-6.
- 800 Wadi, L. and Reinke, A.W. (2020) 'Evolution of microsporidia: An extremely successful group  
801 of eukaryotic intracellular parasites', *PLOS Pathogens*. Edited by L.J. Knoll, 16(2), p.  
802 e1008276. doi:10.1371/journal.ppat.1008276.
- 803 Wang, L., Wang, S. and Li, W. (2012) 'RSeQC: quality control of RNA-seq experiments',  
804 *Bioinformatics*, 28(16), pp. 2184–2185. doi:10.1093/bioinformatics/bts356.
- 805 Willis, A.R. *et al.* (2021) 'A parental transcriptional response to microsporidia infection  
806 induces inherited immunity in offspring', *Science Advances*, 7(19), p. eabf3114.  
807 doi:10.1126/sciadv.abf3114.

- 808 Willis, A.R. and Reinke, A.W. (2022) 'Factors That Determine Microsporidia Infection and  
809 Host Specificity.', *Experientia supplementum (2012)*, 114, pp. 91–114. doi:10.1007/978-3-  
810 030-93306-7\_4.
- 811 Wong, D. *et al.* (2007) 'Genome-wide investigation reveals pathogen-specific and shared  
812 signatures in the response of *Caenorhabditis elegans* to infection', *Genome Biology*, 8(9), p.  
813 R194. doi:10.1186/gb-2007-8-9-r194.
- 814 Zárte-Potes, A. *et al.* (2020) 'The *C. elegans* GATA transcription factor elt-2 mediates  
815 distinct transcriptional responses and opposite infection outcomes towards different  
816 *Bacillus thuringiensis* strains', *PLOS Pathogens*, 16(9), p. e1008826.  
817 doi:10.1371/journal.ppat.1008826.
- 818 Zhang, G. *et al.* (2016) 'A Large Collection of Novel Nematode-Infecting Microsporidia and  
819 Their Diverse Interactions with *Caenorhabditis elegans* and Other Related Nematodes', *PLOS*  
820 *Pathogens*. Edited by J.B. Lok, 12(12), p. e1006093. doi:10.1371/journal.ppat.1006093.
- 821  
822
